# Supplementary material for: Establishment and Comprehensive Analysis of Underlying microRNA-mRNA Interactive Networks in Ovarian Cancer
Source: Hindawi journal article supplement (doi:10.1155/2022/5120342), 2022-03-10
Supplement: f1 [file 5120342.f1.zip]

Table S2 DEMs between OC and normal tissue from GSE119055 dataset.

| ID               | adj.P.Val | P.Value  | t        | B       | logFC    |
|------------------|-----------|----------|----------|---------|----------|
| hsa-miR-99a-5p   | 0.011829  | 2.62E-05 | 6.58072  | 2.9253  | 2.127703 |
| hsa-miR-99a-3p   | 0.022911  | 8.01E-05 | 5.837002 | 1.8406  | 3.785004 |
| hsa-miR-98-5p    | 0.2669    | 1.54E-02 | 2.823751 | -3.0375 | 1.557868 |
| hsa-miR-934      | 0.325009  | 2.71E-02 | -2.51546 | -3.8751 | -2.52713 |
| hsa-miR-874-5p   | 0.078966  | 1.14E-03 | 4.244582 | -0.6224 | 2.43035  |
| hsa-miR-708-5p   | 0.013362  | 4.09E-05 | 6.277831 | 2.5027  | 3.122317 |
| hsa-miR-6723-5p  | 0.1695    | 5.39E-03 | -3.38832 | -2.0623 | -2.42216 |
| hsa-miR-660-5p   | 0.023796  | 9.48E-05 | 5.729706 | 1.7034  | 2.48161  |
| hsa-miR-660-3p   | 0.011829  | 2.71E-05 | 6.556187 | 2.8133  | 3.480528 |
| hsa-miR-654-3p   | 0.383023  | 3.89E-02 | 2.317597 | -3.8949 | 3.127298 |
| hsa-miR-642a-3p  | 0.140645  | 3.25E-03 | -3.66336 | -1.6142 | -2.02163 |
| hsa-miR-628-3p   | 0.316991  | 2.53E-02 | 2.552819 | -3.4933 | 1.664421 |
| hsa-miR-615-3p   | 0.2669    | 1.54E-02 | 2.821168 | -3.0458 | 2.127695 |
| hsa-miR-548q     | 0.023796  | 1.03E-04 | 5.678125 | 1.5999  | 2.304032 |
| hsa-miR-543      | 0.261657  | 1.45E-02 | 2.853659 | -2.9957 | 3.153474 |
| hsa-miR-532-5p   | 0.076361  | 9.68E-04 | 4.336811 | -0.5435 | 1.944603 |
| hsa-miR-532-3p   | 0.023796  | 9.83E-05 | 5.706529 | 1.6692  | 2.568303 |
| hsa-miR-513c-5p  | 0.340455  | 2.96E-02 | 2.467663 | -3.6672 | 4.437059 |
| hsa-miR-513b-5p  | 0.38603   | 4.06E-02 | 2.295267 | -3.9454 | 3.842998 |
| hsa-miR-513a-5p  | 0.36407   | 3.44E-02 | 2.386324 | -3.8072 | 4.477551 |
| hsa-miR-509-3p   | 0.411574  | 4.63E-02 | 2.221305 | -4.1339 | 4.62585  |
| hsa-miR-509-3-5p | 0.402003  | 4.46E-02 | 2.241988 | -4.0652 | 4.707724 |
| hsa-miR-508-3p   | 0.312108  | 2.42E-02 | 2.577358 | -3.4854 | 4.293856 |
| hsa-miR-505-3p   | 0.108772  | 2.31E-03 | 3.851319 | -1.2788 | 1.806257 |
| hsa-miR-504-5p   | 0.161861  | 4.68E-03 | 3.464389 | -1.9397 | 2.318871 |
| hsa-miR-502-5p   | 0.005562  | 4.86E-06 | 7.803046 | 4.3501  | 4.220506 |
| hsa-miR-502-3p   | 0.025447  | 1.30E-04 | 5.529679 | 1.4021  | 2.235492 |
| hsa-miR-501-5p   | 0.09579   | 1.59E-03 | 4.057075 | -0.9396 | 1.911532 |
| hsa-miR-501-3p   | 0.005843  | 9.98E-06 | 7.264446 | 3.7804  | 2.672396 |
| hsa-miR-500b-3p  | 0.011829  | 2.84E-05 | 6.523299 | 2.7627  | 3.440582 |
| hsa-miR-500a-5p  | 0.162716  | 4.87E-03 | 3.442686 | -2.0416 | 1.515641 |
| hsa-miR-500a-3p  | 0.023796  | 1.04E-04 | 5.670539 | 1.6156  | 2.226168 |
| hsa-miR-497-5p   | 0.1445    | 3.79E-03 | 3.579159 | -1.8323 | 2.337917 |
| hsa-miR-495-3p   | 0.150495  | 4.08E-03 | 3.539195 | -1.8182 | 3.923412 |
| hsa-miR-487b-3p  | 0.38749   | 4.16E-02 | 2.280856 | -4.0332 | 2.160252 |
| hsa-miR-455-5p   | 0.122677  | 2.68E-03 | 3.768365 | -1.4227 | 3.236765 |
| hsa-miR-4524a-3p | 0.030077  | 1.84E-04 | 5.314938 | 1.061   | 1.856192 |
| hsa-miR-4510     | 0.028978  | 1.58E-04 | 5.407681 | 1.2168  | 2.464702 |
| hsa-miR-449c-5p  | 0.295417  | 2.09E-02 | -2.65671 | -3.6874 | -2.63206 |
| hsa-miR-449b-5p  | 0.272916  | 1.81E-02 | -2.73578 | -3.5845 | -2.2105  |
| hsa-miR-449a     | 0.201414  | 7.35E-03 | -3.22037 | -2.6601 | -2.74449 |

|                  |          |          |          |         |          |
|------------------|----------|----------|----------|---------|----------|
| hsa-miR-4458     | 0.08489  | 1.32E-03 | 4.162756 | -0.8197 | 1.61307  |
| hsa-miR-4429     | 0.040929 | 2.95E-04 | 5.028653 | 0.6222  | 1.948372 |
| hsa-miR-4417     | 0.211403 | 8.57E-03 | -3.13813 | -2.5292 | -2.14245 |
| hsa-miR-433-3p   | 0.428951 | 4.92E-02 | 2.187548 | -4.0977 | 2.562136 |
| hsa-miR-4329     | 0.09993  | 1.81E-03 | 3.984486 | -1.0731 | 1.637764 |
| hsa-miR-4324     | 0.005843 | 1.02E-05 | 7.246864 | 3.6851  | 4.726414 |
| hsa-miR-429      | 0.126484 | 2.82E-03 | -3.74073 | -1.7211 | -3.01086 |
| hsa-miR-4269     | 0.158552 | 4.44E-03 | 3.493607 | -1.8933 | 3.569062 |
| hsa-miR-424-5p   | 0.351658 | 3.26E-02 | 2.415993 | -3.7348 | 3.279547 |
| hsa-miR-424-3p   | 0.333979 | 2.83E-02 | 2.493528 | -3.7112 | 2.261384 |
| hsa-miR-411-5p   | 0.319729 | 2.59E-02 | 2.541053 | -3.5512 | 3.326144 |
| hsa-miR-3926     | 0.057651 | 5.55E-04 | 4.65689  | 0.0467  | 3.235637 |
| hsa-miR-383-5p   | 0.000351 | 7.67E-08 | 11.51657 | 8.1192  | 7.695929 |
| hsa-miR-381-5p   | 0.18575  | 6.20E-03 | 3.312631 | -2.2217 | 3.01916  |
| hsa-miR-381-3p   | 0.212613 | 8.79E-03 | 3.12454  | -2.554  | 3.781094 |
| hsa-miR-379-5p   | 0.383023 | 3.85E-02 | 2.324491 | -3.9794 | 2.289794 |
| hsa-miR-378i     | 0.241254 | 1.21E-02 | -2.95408 | -2.8476 | -2.19316 |
| hsa-miR-378f     | 0.201634 | 7.45E-03 | -3.21337 | -2.4004 | -2.1877  |
| hsa-miR-378e     | 0.1695   | 5.34E-03 | -3.39276 | -2.0778 | -2.33076 |
| hsa-miR-378c     | 0.222888 | 9.89E-03 | -3.06066 | -2.6886 | -2.31143 |
| hsa-miR-378a-5p  | 0.169681 | 5.53E-03 | -3.37453 | -2.0891 | -2.62196 |
| hsa-miR-378a-3p  | 0.211403 | 8.23E-03 | -3.15981 | -2.573  | -2.4937  |
| hsa-miR-377-3p   | 0.292101 | 2.05E-02 | 2.667854 | -3.3888 | 2.404405 |
| hsa-miR-376c-3p  | 0.227322 | 1.03E-02 | 3.039557 | -2.7255 | 3.829461 |
| hsa-miR-374b-5p  | 0.10839  | 2.27E-03 | 3.858974 | -1.2615 | 2.749153 |
| hsa-miR-3687     | 0.088892 | 1.42E-03 | -4.1214  | -0.8298 | -2.43347 |
| hsa-miR-362-5p   | 0.082463 | 1.23E-03 | 4.203332 | -0.7265 | 1.850856 |
| hsa-miR-362-3p   | 0.013145 | 3.45E-05 | 6.392489 | 2.6163  | 4.058282 |
| hsa-miR-361-3p   | 0.169681 | 5.48E-03 | 3.379006 | -2.0834 | 2.308541 |
| hsa-miR-34c-5p   | 0.097041 | 1.65E-03 | -4.03536 | -1.1075 | -2.44601 |
| hsa-miR-34c-3p   | 0.105981 | 2.09E-03 | -3.90703 | -1.3518 | -2.80471 |
| hsa-miR-34a-3p   | 0.316991 | 2.54E-02 | 2.551409 | -3.5163 | 2.102366 |
| hsa-miR-339-3p   | 0.211403 | 8.30E-03 | 3.155159 | -2.5309 | 1.509005 |
| hsa-miR-337-5p   | 0.387422 | 4.11E-02 | 2.288135 | -3.9836 | 2.484417 |
| hsa-miR-331-5p   | 0.251135 | 1.35E-02 | 2.892152 | -2.9127 | 1.604186 |
| hsa-miR-329-3p   | 0.241254 | 1.17E-02 | 2.968552 | -2.8249 | 3.32615  |
| hsa-miR-328-3p   | 0.025447 | 1.34E-04 | 5.513776 | 1.3661  | 2.538118 |
| hsa-miR-320e     | 0.024122 | 1.16E-04 | 5.601815 | 1.5124  | 1.966142 |
| hsa-miR-3200-3p  | 0.1695   | 5.16E-03 | -3.41153 | -2.1988 | -2.15438 |
| hsa-miR-31-5p    | 0.222888 | 9.83E-03 | -3.06382 | -2.6822 | -3.81873 |
| hsa-miR-31-3p    | 0.1695   | 5.41E-03 | -3.38649 | -2.2659 | -3.07748 |
| hsa-miR-30e-3p   | 0.237213 | 1.13E-02 | 2.990578 | -2.7672 | 2.335312 |
| hsa-miR-30c-1-3p | 0.14992  | 4.03E-03 | 3.545681 | -1.7919 | 2.043385 |
| hsa-miR-29c-5p   | 0.161381 | 4.59E-03 | 3.475594 | -1.9162 | 2.659821 |

|                  |          |          |          |         |          |
|------------------|----------|----------|----------|---------|----------|
| hsa-miR-29c-3p   | 0.005668 | 6.20E-06 | 7.618622 | 4.1836  | 3.126603 |
| hsa-miR-29b-2-5p | 0.288221 | 2.00E-02 | 2.681876 | -3.3128 | 1.594104 |
| hsa-miR-299-5p   | 0.196344 | 6.83E-03 | 3.260598 | -2.3034 | 3.997679 |
| hsa-miR-299-3p   | 0.261324 | 1.45E-02 | 2.856471 | -2.9924 | 2.651127 |
| hsa-miR-26b-5p   | 0.02981  | 1.76E-04 | 5.342757 | 1.1211  | 2.334825 |
| hsa-miR-26b-3p   | 0.013362 | 4.03E-05 | 6.287328 | 2.501   | 2.431247 |
| hsa-miR-224-5p   | 0.076361 | 8.93E-04 | -4.38295 | -0.4678 | -3.25674 |
| hsa-miR-221-5p   | 0.343979 | 3.06E-02 | 2.449904 | -3.6607 | 1.681308 |
| hsa-miR-214-5p   | 0.196344 | 6.82E-03 | 3.260879 | -2.3247 | 3.489026 |
| hsa-miR-214-3p   | 0.369338 | 3.55E-02 | 2.368176 | -4.0823 | 1.647537 |
| hsa-miR-21-3p    | 0.005562 | 3.66E-06 | -8.02385 | 4.5477  | -3.52398 |
| hsa-miR-20a-3p   | 0.1445   | 3.59E-03 | 3.609266 | -1.8449 | 1.691462 |
| hsa-miR-204-5p   | 0.080637 | 1.18E-03 | 4.224287 | -0.6621 | 4.495769 |
| hsa-miR-202-3p   | 0.2669   | 1.63E-02 | 2.79041  | -3.1636 | 5.589224 |
| hsa-miR-200c-3p  | 0.406042 | 4.54E-02 | -2.23316 | -4.1357 | -3.88958 |
| hsa-miR-200b-5p  | 0.05105  | 4.35E-04 | -4.79848 | 0.2574  | -5.32181 |
| hsa-miR-200b-3p  | 0.161381 | 4.57E-03 | -3.47808 | -1.9193 | -4.60104 |
| hsa-miR-200a-5p  | 0.076361 | 9.74E-04 | -4.3332  | -0.6111 | -4.17093 |
| hsa-miR-200a-3p  | 0.10839  | 2.26E-03 | -3.86292 | -1.2724 | -5.44383 |
| hsa-miR-199b-3p  | 0.251135 | 1.36E-02 | 2.889584 | -3.1902 | 2.291912 |
| hsa-miR-199a-5p  | 0.197874 | 7.11E-03 | 3.238427 | -2.5251 | 2.362391 |
| hsa-miR-199a-3p  | 0.251135 | 1.36E-02 | 2.889584 | -3.1902 | 2.291912 |
| hsa-miR-195-5p   | 0.090265 | 1.46E-03 | 4.105158 | -1.0293 | 2.339028 |
| hsa-miR-195-3p   | 0.057651 | 5.44E-04 | 4.66855  | 0.0717  | 3.101318 |
| hsa-miR-193a-3p  | 0.1149   | 2.46E-03 | 3.815475 | -1.3529 | 1.673218 |
| hsa-miR-18a-5p   | 0.097023 | 1.63E-03 | -4.04266 | -0.9704 | -2.40491 |
| hsa-miR-187-3p   | 0.00498  | 2.18E-06 | -8.4378  | 5.2003  | -5.21864 |
| hsa-miR-186-5p   | 0.295852 | 2.10E-02 | 2.654243 | -3.444  | 2.233384 |
| hsa-miR-183-5p   | 0.014813 | 4.86E-05 | -6.16337 | 2.3335  | -4.81626 |
| hsa-miR-183-3p   | 0.161861 | 4.71E-03 | -3.46099 | -2.1466 | -2.18393 |
| hsa-miR-182-5p   | 0.102548 | 1.95E-03 | -3.94516 | -1.1316 | -4.42457 |
| hsa-miR-154-5p   | 0.272916 | 1.81E-02 | 2.736491 | -3.214  | 3.348579 |
| hsa-miR-149-5p   | 0.238213 | 1.14E-02 | 2.984039 | -2.7925 | 1.751568 |
| hsa-miR-148a-3p  | 0.262176 | 1.48E-02 | 2.844172 | -3.0828 | 1.972247 |
| hsa-miR-1468-5p  | 0.076361 | 9.68E-04 | 4.336676 | -0.5521 | 1.508062 |
| hsa-miR-145-3p   | 0.216128 | 9.03E-03 | 3.110043 | -2.5993 | 3.078528 |
| hsa-miR-143-3p   | 0.251135 | 1.36E-02 | 2.890326 | -3.2112 | 1.843361 |
| hsa-miR-141-3p   | 0.255561 | 1.40E-02 | -2.87276 | -2.998  | -5.48355 |
| hsa-miR-140-5p   | 0.206494 | 7.67E-03 | 3.197346 | -2.4354 | 2.880102 |
| hsa-miR-140-3p   | 0.1445   | 3.65E-03 | 3.60002  | -1.8547 | 1.532346 |
| hsa-miR-138-1-3p | 0.076361 | 9.28E-04 | -4.3607  | -0.4511 | -2.16613 |
| hsa-miR-135a-3p  | 0.144121 | 3.53E-03 | 3.618193 | -1.6718 | 2.697433 |
| hsa-miR-134-3p   | 0.211403 | 8.39E-03 | 3.149342 | -2.5073 | 2.540057 |
| hsa-miR-133b     | 0.067654 | 7.25E-04 | 4.502208 | -0.2275 | 2.412372 |

|                   |          |          |          |         |          |
|-------------------|----------|----------|----------|---------|----------|
| hsa-miR-133a-3p   | 0.219474 | 9.26E-03 | 3.096163 | -2.6136 | 3.040945 |
| hsa-miR-132-5p    | 0.231617 | 1.06E-02 | 3.024503 | -2.7643 | 2.304685 |
| hsa-miR-130b-3p   | 0.057249 | 5.13E-04 | -4.70209 | 0.1204  | -2.22206 |
| hsa-miR-130a-3p   | 0.059236 | 5.96E-04 | 4.615346 | -0.0868 | 1.538921 |
| hsa-miR-1294      | 0.024122 | 1.15E-04 | 5.609681 | 1.5249  | 2.430566 |
| hsa-miR-1271-5p   | 0.02981  | 1.71E-04 | 5.360575 | 1.1484  | 2.662363 |
| hsa-miR-125b-5p   | 0.030296 | 1.92E-04 | 5.288998 | 0.9381  | 1.624104 |
| hsa-miR-125b-2-3p | 0.210747 | 7.92E-03 | 3.180661 | -2.4886 | 2.081519 |
| hsa-miR-125b-1-3p | 0.116207 | 2.52E-03 | 3.803665 | -1.3596 | 3.407574 |
| hsa-miR-125a-5p   | 0.076361 | 1.02E-03 | 4.308118 | -0.6796 | 1.592608 |
| hsa-miR-1247-5p   | 0.031561 | 2.07E-04 | 5.243302 | 0.9681  | 3.17416  |
| hsa-miR-10b-5p    | 0.076361 | 1.00E-03 | 4.315815 | -0.5815 | 2.246001 |
| hsa-miR-10b-3p    | 0.2669   | 1.54E-02 | 2.823979 | -3.0629 | 2.312795 |
| hsa-miR-101-5p    | 0.005843 | 9.47E-06 | 7.302544 | 3.8003  | 2.886921 |
| hsa-miR-101-3p    | 0.057651 | 5.32E-04 | 4.680754 | 0.0879  | 2.908892 |
| hsa-miR-100-5p    | 0.0344   | 2.33E-04 | 5.171008 | 0.7944  | 2.308918 |
| hsa-let-7e-3p     | 0.220869 | 9.46E-03 | 3.084449 | -2.619  | 2.427944 |

---
