# Supplementary material for: Establishment and Comprehensive Analysis of Underlying microRNA-mRNA Interactive Networks in Ovarian Cancer
Source: Hindawi journal article supplement (doi:10.1155/2022/5120342), 2022-03-10
Supplement: f1 [file 5120342.f1.zip]

Table S3 Target genes of DEMs predicted by miRNet.

| ID              | Gene     |
|-----------------|----------|
| hsa-mir-199a-5p | ACVR1B   |
| hsa-mir-199a-5p | JAG1     |
| hsa-mir-199a-5p | APOE     |
| hsa-mir-199a-5p | DDR1     |
| hsa-mir-199a-5p | CAV1     |
| hsa-mir-199a-5p | SERPINH1 |
| hsa-mir-199a-5p | CD44     |
| hsa-mir-199a-5p | CDH1     |
| hsa-mir-199a-5p | CDH2     |
| hsa-mir-199a-5p | CDK9     |
| hsa-mir-199a-5p | CDKN1C   |
| hsa-mir-199a-5p | CTSC     |
| hsa-mir-199a-5p | RCC1     |
| hsa-mir-199a-5p | CLTC     |
| hsa-mir-199a-5p | CCR7     |
| hsa-mir-199a-5p | COL19A1  |
| hsa-mir-199a-5p | COX15    |
| hsa-mir-199a-5p | CSNK2A1  |
| hsa-mir-199a-5p | CTGF     |
| hsa-mir-199a-5p | DDX3X    |
| hsa-mir-199a-5p | SLC26A2  |
| hsa-mir-199a-5p | E2F3     |
| hsa-mir-199a-5p | EDN1     |
| hsa-mir-199a-5p | ERBB2    |
| hsa-mir-199a-5p | ERBB3    |
| hsa-mir-199a-5p | ERN1     |
| hsa-mir-199a-5p | ETS1     |
| hsa-mir-199a-5p | ETS2     |
| hsa-mir-199a-5p | EXTL3    |
| hsa-mir-199a-5p | EZH2     |
| hsa-mir-199a-5p | GATA6    |
| hsa-mir-199a-5p | GM2A     |
| hsa-mir-199a-5p | GSK3B    |
| hsa-mir-199a-5p | HIF1A    |
| hsa-mir-199a-5p | HK2      |
| hsa-mir-199a-5p | HSPA5    |
| hsa-mir-199a-5p | IKBKB    |
| hsa-mir-199a-5p | ITGA3    |
| hsa-mir-199a-5p | JUNB     |
| hsa-mir-199a-5p | KRAS     |
| hsa-mir-199a-5p | LDLR     |
| hsa-mir-199a-5p | LIF      |

|                 |         |
|-----------------|---------|
| hsa-mir-199a-5p | SMAD3   |
| hsa-mir-199a-5p | SMAD4   |
| hsa-mir-199a-5p | MECP2   |
| hsa-mir-199a-5p | MAP3K9  |
| hsa-mir-199a-5p | MAP3K11 |
| hsa-mir-199a-5p | ABCC1   |
| hsa-mir-199a-5p | NAB2    |
| hsa-mir-199a-5p | NDUFS2  |
| hsa-mir-199a-5p | NFKB1   |
| hsa-mir-199a-5p | PDE4D   |
| hsa-mir-199a-5p | PIK3CD  |
| hsa-mir-199a-5p | PIN1    |
| hsa-mir-199a-5p | PODXL   |
| hsa-mir-199a-5p | POLR2F  |
| hsa-mir-199a-5p | PSG3    |
| hsa-mir-199a-5p | PSG11   |
| hsa-mir-199a-5p | PSMD9   |
| hsa-mir-199a-5p | PTGS2   |
| hsa-mir-199a-5p | QSOX1   |
| hsa-mir-199a-5p | NECTIN1 |
| hsa-mir-199a-5p | SLC8A1  |
| hsa-mir-199a-5p | SMARCA2 |
| hsa-mir-199a-5p | SNAI1   |
| hsa-mir-199a-5p | SNAP25  |
| hsa-mir-199a-5p | SNTB1   |
| hsa-mir-199a-5p | SOX9    |
| hsa-mir-199a-5p | SULT1E1 |
| hsa-mir-199a-5p | TFDP2   |
| hsa-mir-199a-5p | TGFB2   |
| hsa-mir-199a-5p | TGFBR1  |
| hsa-mir-199a-5p | TUBG1   |
| hsa-mir-199a-5p | UNG     |
| hsa-mir-199a-5p | VASP    |
| hsa-mir-199a-5p | VEGFA   |
| hsa-mir-199a-5p | WNT2    |
| hsa-mir-199a-5p | ZNF195  |
| hsa-mir-199a-5p | ZNF215  |
| hsa-mir-199a-5p | PAX8    |
| hsa-mir-199a-5p | AKAP17A |
| hsa-mir-199a-5p | FZD4    |
| hsa-mir-199a-5p | FZD6    |
| hsa-mir-199a-5p | MAP4K3  |
| hsa-mir-199a-5p | BECN1   |
| hsa-mir-199a-5p | LIN7A   |

|                 |            |
|-----------------|------------|
| hsa-mir-199a-5p | TSC22D1    |
| hsa-mir-199a-5p | KL         |
| hsa-mir-199a-5p | CRIP1      |
| hsa-mir-199a-5p | MAFB       |
| hsa-mir-199a-5p | OXS1       |
| hsa-mir-199a-5p | MED6       |
| hsa-mir-199a-5p | TRIM10     |
| hsa-mir-199a-5p | PIAS3      |
| hsa-mir-199a-5p | VAV3       |
| hsa-mir-199a-5p | RER1       |
| hsa-mir-199a-5p | DDX19B     |
| hsa-mir-199a-5p | ATF6       |
| hsa-mir-199a-5p | RAB21      |
| hsa-mir-199a-5p | PLXND1     |
| hsa-mir-199a-5p | SIRT1      |
| hsa-mir-199a-5p | POLA2      |
| hsa-mir-199a-5p | RNF11      |
| hsa-mir-199a-5p | GPR78      |
| hsa-mir-199a-5p | RNF115     |
| hsa-mir-199a-5p | RND1       |
| hsa-mir-199a-5p | ZNF544     |
| hsa-mir-199a-5p | SETD2      |
| hsa-mir-199a-5p | TMOD2      |
| hsa-mir-199a-5p | PDE11A     |
| hsa-mir-199a-5p | ZDHHC9     |
| hsa-mir-199a-5p | ZNF117     |
| hsa-mir-199a-5p | SLC38A2    |
| hsa-mir-199a-5p | LAX1       |
| hsa-mir-199a-5p | VPS53      |
| hsa-mir-199a-5p | DRAM1      |
| hsa-mir-199a-5p | DNAJA4     |
| hsa-mir-199a-5p | ZNF415     |
| hsa-mir-199a-5p | CSGALNACT1 |
| hsa-mir-199a-5p | PLGRKT     |
| hsa-mir-199a-5p | CCNL1      |
| hsa-mir-199a-5p | AGTRAP     |
| hsa-mir-199a-5p | RIC8A      |
| hsa-mir-199a-5p | C16orf58   |
| hsa-mir-199a-5p | PLEKHG2    |
| hsa-mir-199a-5p | WNK1       |
| hsa-mir-199a-5p | CENPO      |
| hsa-mir-199a-5p | PANK3      |
| hsa-mir-199a-5p | PTCD2      |
| hsa-mir-199a-5p | ZNF669     |

|                 |           |
|-----------------|-----------|
| hsa-mir-199a-5p | C3orf36   |
| hsa-mir-199a-5p | NAA15     |
| hsa-mir-199a-5p | DDHD1     |
| hsa-mir-199a-5p | ZNF611    |
| hsa-mir-199a-5p | SESN2     |
| hsa-mir-199a-5p | ZNF394    |
| hsa-mir-199a-5p | DDI2      |
| hsa-mir-199a-5p | ZBTB37    |
| hsa-mir-199a-5p | CHRFAM7A  |
| hsa-mir-199a-5p | ZNF468    |
| hsa-mir-199a-5p | ZNF625    |
| hsa-mir-199a-5p | ARHGAP12  |
| hsa-mir-199a-5p | TMEM54    |
| hsa-mir-199a-5p | TNFRSF13C |
| hsa-mir-199a-5p | SLC16A10  |
| hsa-mir-199a-5p | ZNF440    |
| hsa-mir-199a-5p | OSCP1     |
| hsa-mir-199a-5p | CHCHD4    |
| hsa-mir-199a-5p | XRRA1     |
| hsa-mir-199a-5p | A2ML1     |
| hsa-mir-199a-5p | CEP120    |
| hsa-mir-199a-5p | SNRNP48   |
| hsa-mir-199a-5p | TBC1D21   |
| hsa-mir-199a-5p | ZFP1      |
| hsa-mir-199a-5p | ZNF846    |
| hsa-mir-199a-5p | ZNF791    |
| hsa-mir-199a-5p | ZNF525    |
| hsa-mir-199a-5p | PLPP4     |
| hsa-mir-199a-5p | ZNF584    |
| hsa-mir-199a-5p | DYNAP     |
| hsa-mir-199a-5p | ZNF844    |
| hsa-mir-199a-5p | SLC27A1   |
| hsa-mir-199a-5p | ZNF772    |
| hsa-mir-199a-5p | C1orf226  |
| hsa-mir-199a-5p | ZNF286B   |
| hsa-mir-199a-5p | PSAPL1    |
| hsa-mir-199a-3p | AKT1      |
| hsa-mir-199a-3p | APOE      |
| hsa-mir-199a-3p | CAV2      |
| hsa-mir-199a-3p | CD44      |
| hsa-mir-199a-3p | CDK7      |
| hsa-mir-199a-3p | COL4A5    |
| hsa-mir-199a-3p | COX10     |
| hsa-mir-199a-3p | MAPK14    |

|                 |         |
|-----------------|---------|
| hsa-mir-199a-3p | CSNK1A1 |
| hsa-mir-199a-3p | CSRP2   |
| hsa-mir-199a-3p | E2F2    |
| hsa-mir-199a-3p | ETS2    |
| hsa-mir-199a-3p | FGF2    |
| hsa-mir-199a-3p | FLT1    |
| hsa-mir-199a-3p | FXN     |
| hsa-mir-199a-3p | MTOR    |
| hsa-mir-199a-3p | FUT4    |
| hsa-mir-199a-3p | GNAS    |
| hsa-mir-199a-3p | HGF     |
| hsa-mir-199a-3p | HLA-B   |
| hsa-mir-199a-3p | FOXA2   |
| hsa-mir-199a-3p | ID2     |
| hsa-mir-199a-3p | IGF1    |
| hsa-mir-199a-3p | FO XK2  |
| hsa-mir-199a-3p | ITGA3   |
| hsa-mir-199a-3p | JUNB    |
| hsa-mir-199a-3p | KDR     |
| hsa-mir-199a-3p | KRT7    |
| hsa-mir-199a-3p | MECP2   |
| hsa-mir-199a-3p | MAP3K4  |
| hsa-mir-199a-3p | MET     |
| hsa-mir-199a-3p | KMT2A   |
| hsa-mir-199a-3p | CDK17   |
| hsa-mir-199a-3p | PKM     |
| hsa-mir-199a-3p | MAPK1   |
| hsa-mir-199a-3p | MAPK8   |
| hsa-mir-199a-3p | MAPK9   |
| hsa-mir-199a-3p | PTGS2   |
| hsa-mir-199a-3p | SMARCA2 |
| hsa-mir-199a-3p | SOD2    |
| hsa-mir-199a-3p | STK11   |
| hsa-mir-199a-3p | TFAM    |
| hsa-mir-199a-3p | UBE2V1  |
| hsa-mir-199a-3p | UCK2    |
| hsa-mir-199a-3p | VEGFA   |
| hsa-mir-199a-3p | DDX39B  |
| hsa-mir-199a-3p | MLF2    |
| hsa-mir-199a-3p | STC2    |
| hsa-mir-199a-3p | UNC5C   |
| hsa-mir-199a-3p | SGPL1   |
| hsa-mir-199a-3p | SYNGR2  |
| hsa-mir-199a-3p | QKI     |

|                 |          |
|-----------------|----------|
| hsa-mir-199a-3p | GFPT2    |
| hsa-mir-199a-3p | MED6     |
| hsa-mir-199a-3p | TSPAN3   |
| hsa-mir-199a-3p | PAK4     |
| hsa-mir-199a-3p | YAP1     |
| hsa-mir-199a-3p | PNRC1    |
| hsa-mir-199a-3p | FICD     |
| hsa-mir-199a-3p | ZHX1     |
| hsa-mir-199a-3p | TAB2     |
| hsa-mir-199a-3p | PHF8     |
| hsa-mir-199a-3p | GGA3     |
| hsa-mir-199a-3p | BLOC1S6  |
| hsa-mir-199a-3p | RGS17    |
| hsa-mir-199a-3p | GOLIM4   |
| hsa-mir-199a-3p | CCDC59   |
| hsa-mir-199a-3p | SOCS7    |
| hsa-mir-199a-3p | TMED5    |
| hsa-mir-199a-3p | HSD17B12 |
| hsa-mir-199a-3p | VTG1     |
| hsa-mir-199a-3p | LUC7L2   |
| hsa-mir-199a-3p | MTRF1L   |
| hsa-mir-199a-3p | DDIT4    |
| hsa-mir-199a-3p | ARL15    |
| hsa-mir-199a-3p | PAQR5    |
| hsa-mir-199a-3p | FKBP14   |
| hsa-mir-199a-3p | CEP55    |
| hsa-mir-199a-3p | C11orf57 |
| hsa-mir-199a-3p | DNAJA4   |
| hsa-mir-199a-3p | ETNK1    |
| hsa-mir-199a-3p | SLC30A6  |
| hsa-mir-199a-3p | ATF7IP   |
| hsa-mir-199a-3p | CCNL1    |
| hsa-mir-199a-3p | CREBZF   |
| hsa-mir-199a-3p | MCCC2    |
| hsa-mir-199a-3p | ZNF106   |
| hsa-mir-199a-3p | VPS33A   |
| hsa-mir-199a-3p | WNK2     |
| hsa-mir-199a-3p | TAF1D    |
| hsa-mir-199a-3p | EFHD2    |
| hsa-mir-199a-3p | NOL10    |
| hsa-mir-199a-3p | ZNF585B  |
| hsa-mir-199a-3p | NACC1    |
| hsa-mir-199a-3p | SMYD4    |
| hsa-mir-199a-3p | WDR17    |

|                 |                |
|-----------------|----------------|
| hsa-mir-199a-3p | TMEM18         |
| hsa-mir-199a-3p | OCIAD2         |
| hsa-mir-199a-3p | LIN54          |
| hsa-mir-199a-3p | CCDC80         |
| hsa-mir-199a-3p | TMEM161B       |
| hsa-mir-199a-3p | ZXDB           |
| hsa-mir-199a-3p | TOR1AIP2       |
| hsa-mir-199a-3p | ZNF384         |
| hsa-mir-199a-3p | ZDHHC24        |
| hsa-mir-199a-3p | MCOLN2         |
| hsa-mir-199a-3p | CNEP1R1        |
| hsa-mir-199a-3p | LINC00346      |
| hsa-mir-199a-3p | RGMB           |
| hsa-mir-199a-3p | ACER2          |
| hsa-mir-199a-3p | RBM43          |
| hsa-mir-199a-3p | TMEM189        |
| hsa-mir-199a-3p | TMEM189-UBE2V1 |
| hsa-mir-199a-3p | C7orf55-LUC7L2 |
| hsa-mir-140-5p  | ADA            |
| hsa-mir-140-5p  | ALDH1A1        |
| hsa-mir-140-5p  | PRDM1          |
| hsa-mir-140-5p  | DST            |
| hsa-mir-140-5p  | CAPN1          |
| hsa-mir-140-5p  | CEBPD          |
| hsa-mir-140-5p  | CSK            |
| hsa-mir-140-5p  | DNMT1          |
| hsa-mir-140-5p  | E2F3           |
| hsa-mir-140-5p  | EP300          |
| hsa-mir-140-5p  | ESR2           |
| hsa-mir-140-5p  | FEN1           |
| hsa-mir-140-5p  | FGF2           |
| hsa-mir-140-5p  | FGF9           |
| hsa-mir-140-5p  | GALC           |
| hsa-mir-140-5p  | GATA6          |
| hsa-mir-140-5p  | HOXD12         |
| hsa-mir-140-5p  | IGF1R          |
| hsa-mir-140-5p  | IGFBP5         |
| hsa-mir-140-5p  | LAMC1          |
| hsa-mir-140-5p  | LDLR           |
| hsa-mir-140-5p  | MMP13          |
| hsa-mir-140-5p  | CYTB           |
| hsa-mir-140-5p  | MYO6           |
| hsa-mir-140-5p  | NDUFA2         |
| hsa-mir-140-5p  | SEPT2          |

|                |          |
|----------------|----------|
| hsa-mir-140-5p | PAX6     |
| hsa-mir-140-5p | PDGFRA   |
| hsa-mir-140-5p | PIN1     |
| hsa-mir-140-5p | KLK10    |
| hsa-mir-140-5p | RALA     |
| hsa-mir-140-5p | SOX2     |
| hsa-mir-140-5p | SOX4     |
| hsa-mir-140-5p | SOX9     |
| hsa-mir-140-5p | STAT1    |
| hsa-mir-140-5p | TGFBR1   |
| hsa-mir-140-5p | VEGFA    |
| hsa-mir-140-5p | VEZF1    |
| hsa-mir-140-5p | CUBN     |
| hsa-mir-140-5p | FXR1     |
| hsa-mir-140-5p | BRAP     |
| hsa-mir-140-5p | FZD6     |
| hsa-mir-140-5p | STK24    |
| hsa-mir-140-5p | ADAM9    |
| hsa-mir-140-5p | RIOK3    |
| hsa-mir-140-5p | PHACTR2  |
| hsa-mir-140-5p | HDAC4    |
| hsa-mir-140-5p | TSC22D2  |
| hsa-mir-140-5p | ZC3H11A  |
| hsa-mir-140-5p | MED13    |
| hsa-mir-140-5p | BCL2L11  |
| hsa-mir-140-5p | PPIE     |
| hsa-mir-140-5p | PRPF8    |
| hsa-mir-140-5p | IGF2BP1  |
| hsa-mir-140-5p | RAB10    |
| hsa-mir-140-5p | ZNF652   |
| hsa-mir-140-5p | CNKSR2   |
| hsa-mir-140-5p | RPRD2    |
| hsa-mir-140-5p | LARP1    |
| hsa-mir-140-5p | MMD      |
| hsa-mir-140-5p | DNPEP    |
| hsa-mir-140-5p | TSPAN12  |
| hsa-mir-140-5p | ARIH1    |
| hsa-mir-140-5p | SNORD12C |
| hsa-mir-140-5p | RPUSD2   |
| hsa-mir-140-5p | RAB30    |
| hsa-mir-140-5p | OSTM1    |
| hsa-mir-140-5p | GLRX5    |
| hsa-mir-140-5p | HDAC7    |
| hsa-mir-140-5p | TM7SF3   |



|                |         |
|----------------|---------|
| hsa-mir-140-5p | FGFRL1  |
| hsa-mir-140-5p | ZCCHC2  |
| hsa-mir-140-5p | MRPS10  |
| hsa-mir-140-5p | MEG3    |
| hsa-mir-140-5p | YOD1    |
| hsa-mir-140-5p | STRADB  |
| hsa-mir-140-5p | CAMK2N1 |
| hsa-mir-140-5p | SMURF1  |
| hsa-mir-140-5p | LYRM2   |
| hsa-mir-140-5p | GALNT16 |
| hsa-mir-140-5p | GPR107  |
| hsa-mir-140-5p | SPCS3   |
| hsa-mir-140-5p | SNX16   |
| hsa-mir-140-5p | AIDA    |
| hsa-mir-140-5p | CASD1   |
| hsa-mir-140-5p | ZNF426  |
| hsa-mir-140-5p | EFHD2   |
| hsa-mir-140-5p | HMGN5   |
| hsa-mir-140-5p | PANK3   |
| hsa-mir-140-5p | KATNBL1 |
| hsa-mir-140-5p | ACTR5   |
| hsa-mir-140-5p | YIPF4   |
| hsa-mir-140-5p | PLEKHA8 |
| hsa-mir-140-5p | SMCR8   |
| hsa-mir-140-5p | SIRPA   |
| hsa-mir-140-5p | SPRED1  |
| hsa-mir-140-5p | IFNLR1  |
| hsa-mir-140-5p | TMED4   |
| hsa-mir-140-5p | RNF149  |
| hsa-mir-140-5p | ZDHHC21 |
| hsa-mir-140-5p | LIN28B  |
| hsa-mir-455-5p | APLP2   |
| hsa-mir-455-5p | TRIM23  |
| hsa-mir-455-5p | RHOH    |
| hsa-mir-455-5p | RUNX1T1 |
| hsa-mir-455-5p | CD36    |
| hsa-mir-455-5p | CDKN1B  |
| hsa-mir-455-5p | CRKL    |
| hsa-mir-455-5p | DDX3X   |
| hsa-mir-455-5p | DYRK1A  |
| hsa-mir-455-5p | ERCC4   |
| hsa-mir-455-5p | ETS2    |
| hsa-mir-455-5p | HOXA1   |
| hsa-mir-455-5p | KPNA3   |

|                |         |
|----------------|---------|
| hsa-mir-455-5p | MAP3K9  |
| hsa-mir-455-5p | MYBL1   |
| hsa-mir-455-5p | DRG1    |
| hsa-mir-455-5p | OTX1    |
| hsa-mir-455-5p | PCCA    |
| hsa-mir-455-5p | PCCB    |
| hsa-mir-455-5p | PIK3R1  |
| hsa-mir-455-5p | PTPRB   |
| hsa-mir-455-5p | REL     |
| hsa-mir-455-5p | RPS6KB1 |
| hsa-mir-455-5p | RPS14   |
| hsa-mir-455-5p | SLC1A5  |
| hsa-mir-455-5p | SOX11   |
| hsa-mir-455-5p | UBA7    |
| hsa-mir-455-5p | ZNF134  |
| hsa-mir-455-5p | ZNF138  |
| hsa-mir-455-5p | ZFAND5  |
| hsa-mir-455-5p | SOCS3   |
| hsa-mir-455-5p | TXNL1   |
| hsa-mir-455-5p | QKI     |
| hsa-mir-455-5p | PCLAF   |
| hsa-mir-455-5p | RASSF2  |
| hsa-mir-455-5p | G3BP1   |
| hsa-mir-455-5p | VAV3    |
| hsa-mir-455-5p | IPO7    |
| hsa-mir-455-5p | ZNF460  |
| hsa-mir-455-5p | CCNI    |
| hsa-mir-455-5p | POLI    |
| hsa-mir-455-5p | FKBP9   |
| hsa-mir-455-5p | PLEKHA6 |
| hsa-mir-455-5p | SEPHS1  |
| hsa-mir-455-5p | RAB18   |
| hsa-mir-455-5p | IGSF9B  |
| hsa-mir-455-5p | FBXO28  |
| hsa-mir-455-5p | ARC     |
| hsa-mir-455-5p | MGRN1   |
| hsa-mir-455-5p | NCSTN   |
| hsa-mir-455-5p | PRKD2   |
| hsa-mir-455-5p | LYPD3   |
| hsa-mir-455-5p | ZNF544  |
| hsa-mir-455-5p | MYLIP   |
| hsa-mir-455-5p | ZNF354C |
| hsa-mir-455-5p | ZNF117  |
| hsa-mir-455-5p | TRPV2   |

|                |              |
|----------------|--------------|
| hsa-mir-455-5p | TRIM33       |
| hsa-mir-455-5p | NUP54        |
| hsa-mir-455-5p | PRR13        |
| hsa-mir-455-5p | DDX4         |
| hsa-mir-455-5p | BNC2         |
| hsa-mir-455-5p | AHI1         |
| hsa-mir-455-5p | PIWIL2       |
| hsa-mir-455-5p | MTPAP        |
| hsa-mir-455-5p | DARS2        |
| hsa-mir-455-5p | DEPDC1B      |
| hsa-mir-455-5p | NUFIP2       |
| hsa-mir-455-5p | FAM160B1     |
| hsa-mir-455-5p | ATP13A3      |
| hsa-mir-455-5p | MOB3B        |
| hsa-mir-455-5p | TMC7         |
| hsa-mir-455-5p | DSN1         |
| hsa-mir-455-5p | WDR26        |
| hsa-mir-455-5p | KLHL15       |
| hsa-mir-455-5p | GSG1         |
| hsa-mir-455-5p | SLC9A7       |
| hsa-mir-455-5p | UBASH3B      |
| hsa-mir-455-5p | ZNF625       |
| hsa-mir-455-5p | LYRM7        |
| hsa-mir-455-5p | NT5C1B       |
| hsa-mir-455-5p | MOGAT1       |
| hsa-mir-455-5p | C15orf40     |
| hsa-mir-455-5p | TMEM170A     |
| hsa-mir-455-5p | TNFAIP8L1    |
| hsa-mir-455-5p | PABPC4L      |
| hsa-mir-455-5p | UBXN2B       |
| hsa-mir-455-5p | LETM2        |
| hsa-mir-455-5p | TRUB1        |
| hsa-mir-455-5p | BCDIN3D      |
| hsa-mir-455-5p | TCF23        |
| hsa-mir-455-5p | CAMSAP1      |
| hsa-mir-455-5p | DNAJC18      |
| hsa-mir-455-5p | PATL1        |
| hsa-mir-455-5p | YIPF6        |
| hsa-mir-455-5p | ZNF772       |
| hsa-mir-455-5p | ZBTB34       |
| hsa-mir-455-5p | FAM229B      |
| hsa-mir-455-5p | NT5C1B-RDH14 |
| hsa-mir-140-3p | ABL2         |
| hsa-mir-140-3p | ACVR2B       |

|                |           |
|----------------|-----------|
| hsa-mir-140-3p | ADARB1    |
| hsa-mir-140-3p | AHCY      |
| hsa-mir-140-3p | AMFR      |
| hsa-mir-140-3p | BCAT1     |
| hsa-mir-140-3p | KLF9      |
| hsa-mir-140-3p | CAPN1     |
| hsa-mir-140-3p | CAPZA1    |
| hsa-mir-140-3p | CASP10    |
| hsa-mir-140-3p | CD38      |
| hsa-mir-140-3p | CDC25A    |
| hsa-mir-140-3p | CDK6      |
| hsa-mir-140-3p | AP2M1     |
| hsa-mir-140-3p | CNN2      |
| hsa-mir-140-3p | COL4A1    |
| hsa-mir-140-3p | CLDN7     |
| hsa-mir-140-3p | CRY2      |
| hsa-mir-140-3p | EPB41     |
| hsa-mir-140-3p | EPRS      |
| hsa-mir-140-3p | ERCC1     |
| hsa-mir-140-3p | ESR2      |
| hsa-mir-140-3p | FANCA     |
| hsa-mir-140-3p | FAU       |
| hsa-mir-140-3p | FDFT1     |
| hsa-mir-140-3p | FN1       |
| hsa-mir-140-3p | FPGS      |
| hsa-mir-140-3p | GDNF      |
| hsa-mir-140-3p | GFPT1     |
| hsa-mir-140-3p | GGT7      |
| hsa-mir-140-3p | GPC1      |
| hsa-mir-140-3p | MKNK2     |
| hsa-mir-140-3p | GUK1      |
| hsa-mir-140-3p | NCKAP1L   |
| hsa-mir-140-3p | HMGN1     |
| hsa-mir-140-3p | HMGN2     |
| hsa-mir-140-3p | HNRNPA2B1 |
| hsa-mir-140-3p | ITGA6     |
| hsa-mir-140-3p | KCNMB1    |
| hsa-mir-140-3p | KIF5A     |
| hsa-mir-140-3p | TNPO1     |
| hsa-mir-140-3p | LAMP2     |
| hsa-mir-140-3p | LRPAP1    |
| hsa-mir-140-3p | MAX       |
| hsa-mir-140-3p | MAP3K3    |
| hsa-mir-140-3p | MICB      |

|                |          |
|----------------|----------|
| hsa-mir-140-3p | MOBP     |
| hsa-mir-140-3p | MYO6     |
| hsa-mir-140-3p | NFYA     |
| hsa-mir-140-3p | NRF1     |
| hsa-mir-140-3p | FURIN    |
| hsa-mir-140-3p | ATP8B1   |
| hsa-mir-140-3p | PLCL1    |
| hsa-mir-140-3p | MAPK8    |
| hsa-mir-140-3p | RPL22    |
| hsa-mir-140-3p | RPS24    |
| hsa-mir-140-3p | CLIP1    |
| hsa-mir-140-3p | ATXN1    |
| hsa-mir-140-3p | CXCL6    |
| hsa-mir-140-3p | SKI      |
| hsa-mir-140-3p | SLC1A4   |
| hsa-mir-140-3p | SLC2A5   |
| hsa-mir-140-3p | SNTB2    |
| hsa-mir-140-3p | CAPN15   |
| hsa-mir-140-3p | SS18     |
| hsa-mir-140-3p | TMBIM6   |
| hsa-mir-140-3p | THRA     |
| hsa-mir-140-3p | TPI1     |
| hsa-mir-140-3p | TRPC4    |
| hsa-mir-140-3p | UBE2V1   |
| hsa-mir-140-3p | UBTF     |
| hsa-mir-140-3p | UCK2     |
| hsa-mir-140-3p | WEE1     |
| hsa-mir-140-3p | ZNF207   |
| hsa-mir-140-3p | SLC30A3  |
| hsa-mir-140-3p | BTG2     |
| hsa-mir-140-3p | PABPN1   |
| hsa-mir-140-3p | SLC7A5   |
| hsa-mir-140-3p | MKKS     |
| hsa-mir-140-3p | NRIP1    |
| hsa-mir-140-3p | ITGA10   |
| hsa-mir-140-3p | STC2     |
| hsa-mir-140-3p | PSMG1    |
| hsa-mir-140-3p | KSR1     |
| hsa-mir-140-3p | USP14    |
| hsa-mir-140-3p | GCNT3    |
| hsa-mir-140-3p | ZBTB22   |
| hsa-mir-140-3p | GDF15    |
| hsa-mir-140-3p | KIAA0040 |
| hsa-mir-140-3p | GPRIN2   |

|                |          |
|----------------|----------|
| hsa-mir-140-3p | DAZAP2   |
| hsa-mir-140-3p | POM121   |
| hsa-mir-140-3p | AP5Z1    |
| hsa-mir-140-3p | ZBTB40   |
| hsa-mir-140-3p | SLC23A1  |
| hsa-mir-140-3p | MAMLD1   |
| hsa-mir-140-3p | ATP6AP2  |
| hsa-mir-140-3p | AP3S2    |
| hsa-mir-140-3p | FSTL3    |
| hsa-mir-140-3p | EMC8     |
| hsa-mir-140-3p | TUBA1B   |
| hsa-mir-140-3p | ATP8A1   |
| hsa-mir-140-3p | ZER1     |
| hsa-mir-140-3p | TADA3    |
| hsa-mir-140-3p | NEBL     |
| hsa-mir-140-3p | MYL12A   |
| hsa-mir-140-3p | NUP50    |
| hsa-mir-140-3p | ZNF460   |
| hsa-mir-140-3p | CD3EAP   |
| hsa-mir-140-3p | SERINC3  |
| hsa-mir-140-3p | TMED10   |
| hsa-mir-140-3p | RAB31    |
| hsa-mir-140-3p | NUDT21   |
| hsa-mir-140-3p | UBE2C    |
| hsa-mir-140-3p | TRIM31   |
| hsa-mir-140-3p | XPOT     |
| hsa-mir-140-3p | VASH1    |
| hsa-mir-140-3p | ADGRL1   |
| hsa-mir-140-3p | MLXIP    |
| hsa-mir-140-3p | KIAA0907 |
| hsa-mir-140-3p | ZNF423   |
| hsa-mir-140-3p | NFASC    |
| hsa-mir-140-3p | GRAMD4   |
| hsa-mir-140-3p | TTLL12   |
| hsa-mir-140-3p | DNAJC9   |
| hsa-mir-140-3p | PDS5A    |
| hsa-mir-140-3p | ANKRD12  |
| hsa-mir-140-3p | CBX6     |
| hsa-mir-140-3p | SUZ12    |
| hsa-mir-140-3p | DDAH1    |
| hsa-mir-140-3p | PPP1R15A |
| hsa-mir-140-3p | CADM1    |
| hsa-mir-140-3p | PITPNB   |
| hsa-mir-140-3p | IBTK     |

|                |          |
|----------------|----------|
| hsa-mir-140-3p | GAPVD1   |
| hsa-mir-140-3p | SENP3    |
| hsa-mir-140-3p | PITPNC1  |
| hsa-mir-140-3p | PALD1    |
| hsa-mir-140-3p | RACGAP1  |
| hsa-mir-140-3p | PSAT1    |
| hsa-mir-140-3p | TNPO2    |
| hsa-mir-140-3p | ZBTB21   |
| hsa-mir-140-3p | COMMD2   |
| hsa-mir-140-3p | IER3IP1  |
| hsa-mir-140-3p | PCYOX1   |
| hsa-mir-140-3p | CTDSPL2  |
| hsa-mir-140-3p | ESF1     |
| hsa-mir-140-3p | ERRFI1   |
| hsa-mir-140-3p | HEATR5B  |
| hsa-mir-140-3p | MAP10    |
| hsa-mir-140-3p | CDCA4    |
| hsa-mir-140-3p | CDCA8    |
| hsa-mir-140-3p | CCDC198  |
| hsa-mir-140-3p | RPRD1A   |
| hsa-mir-140-3p | SETD5    |
| hsa-mir-140-3p | LRRC20   |
| hsa-mir-140-3p | KIF21A   |
| hsa-mir-140-3p | SERTAD4  |
| hsa-mir-140-3p | CLDND1   |
| hsa-mir-140-3p | SLC39A10 |
| hsa-mir-140-3p | LYRM2    |
| hsa-mir-140-3p | CBX8     |
| hsa-mir-140-3p | ZNF490   |
| hsa-mir-140-3p | NUFIP2   |
| hsa-mir-140-3p | ERAP2    |
| hsa-mir-140-3p | MARC1    |
| hsa-mir-140-3p | IPPK     |
| hsa-mir-140-3p | TBC1D15  |
| hsa-mir-140-3p | USP46    |
| hsa-mir-140-3p | MARCKSL1 |
| hsa-mir-140-3p | DDA1     |
| hsa-mir-140-3p | TMEM109  |
| hsa-mir-140-3p | CORO7    |
| hsa-mir-140-3p | C3orf52  |
| hsa-mir-140-3p | SCD5     |
| hsa-mir-140-3p | WDR26    |
| hsa-mir-140-3p | INTS14   |
| hsa-mir-140-3p | TMEM133  |

|                |                |
|----------------|----------------|
| hsa-mir-140-3p | ARID5B         |
| hsa-mir-140-3p | DDI2           |
| hsa-mir-140-3p | BRMS1L         |
| hsa-mir-140-3p | EBPL           |
| hsa-mir-140-3p | AIFM2          |
| hsa-mir-140-3p | TBRG1          |
| hsa-mir-140-3p | SHANK3         |
| hsa-mir-140-3p | ZNF518B        |
| hsa-mir-140-3p | BOD1           |
| hsa-mir-140-3p | CABLES1        |
| hsa-mir-140-3p | CHRD1          |
| hsa-mir-140-3p | MTDH           |
| hsa-mir-140-3p | ORMDL3         |
| hsa-mir-140-3p | GLMP           |
| hsa-mir-140-3p | FAM46B         |
| hsa-mir-140-3p | SLC16A10       |
| hsa-mir-140-3p | C11orf74       |
| hsa-mir-140-3p | SLC24A4        |
| hsa-mir-140-3p | TTC39C         |
| hsa-mir-140-3p | FAM213B        |
| hsa-mir-140-3p | FAM3D          |
| hsa-mir-140-3p | VKORC1L1       |
| hsa-mir-140-3p | GPR180         |
| hsa-mir-140-3p | ZNF431         |
| hsa-mir-140-3p | SPATA13        |
| hsa-mir-140-3p | PXDC1          |
| hsa-mir-140-3p | FOKK1          |
| hsa-mir-140-3p | ZDHHC23        |
| hsa-mir-140-3p | METRNL         |
| hsa-mir-140-3p | NWD1           |
| hsa-mir-140-3p | C17orf51       |
| hsa-mir-140-3p | ACER2          |
| hsa-mir-140-3p | NANOS1         |
| hsa-mir-140-3p | EVX2           |
| hsa-mir-140-3p | DRAXIN         |
| hsa-mir-140-3p | STUM           |
| hsa-mir-140-3p | GJB7           |
| hsa-mir-140-3p | TMEM189        |
| hsa-mir-140-3p | TMEM189-UBE2V1 |
| hsa-mir-140-3p | IL17REL        |
| hsa-mir-140-3p | TMEM236        |
| hsa-mir-140-3p | TMEM78         |
| hsa-mir-140-3p | TMED7-TICAM2   |
| hsa-mir-140-3p | MTRNR2L5       |



|                |                |
|----------------|----------------|
| hsa-mir-140-3p | C15orf38-AP3S2 |
| hsa-mir-140-3p | BCL2L2-PABPN1  |
| hsa-mir-429    | XIAP           |
| hsa-mir-429    | ARHGDIA        |
| hsa-mir-429    | RERE           |
| hsa-mir-429    | ATP5G3         |
| hsa-mir-429    | ATP6V1E1       |
| hsa-mir-429    | AVPR1A         |
| hsa-mir-429    | BCL2           |
| hsa-mir-429    | CASP2          |
| hsa-mir-429    | SERPINH1       |
| hsa-mir-429    | CCNT2          |
| hsa-mir-429    | SEPT7          |
| hsa-mir-429    | CDKN1B         |
| hsa-mir-429    | CRKL           |
| hsa-mir-429    | CYP1A1         |
| hsa-mir-429    | DNMT1          |
| hsa-mir-429    | EP300          |
| hsa-mir-429    | EZH2           |
| hsa-mir-429    | ACSL4          |
| hsa-mir-429    | FKBP5          |
| hsa-mir-429    | GATA6          |
| hsa-mir-429    | GOT1           |
| hsa-mir-429    | MKNK2          |
| hsa-mir-429    | HIF1A          |
| hsa-mir-429    | HOXB5          |
| hsa-mir-429    | IGF2           |
| hsa-mir-429    | IL4            |
| hsa-mir-429    | IRS1           |
| hsa-mir-429    | JUN            |
| hsa-mir-429    | KRAS           |
| hsa-mir-429    | LMNB1          |
| hsa-mir-429    | M6PR           |
| hsa-mir-429    | DNAJB9         |
| hsa-mir-429    | MYB            |
| hsa-mir-429    | MYC            |
| hsa-mir-429    | PAK2           |
| hsa-mir-429    | PDPK1          |
| hsa-mir-429    | PKD1           |
| hsa-mir-429    | PLCG1          |
| hsa-mir-429    | PMAIP1         |
| hsa-mir-429    | MAPK7          |
| hsa-mir-429    | PTEN           |
| hsa-mir-429    | PTPN4          |

|             |           |
|-------------|-----------|
| hsa-mir-429 | PTPRD     |
| hsa-mir-429 | RBBP4     |
| hsa-mir-429 | SHC1      |
| hsa-mir-429 | SHOX2     |
| hsa-mir-429 | FSCN1     |
| hsa-mir-429 | SOX2      |
| hsa-mir-429 | SP1       |
| hsa-mir-429 | ELOC      |
| hsa-mir-429 | TCF7L2    |
| hsa-mir-429 | ZEB1      |
| hsa-mir-429 | TIMP2     |
| hsa-mir-429 | TPD52L1   |
| hsa-mir-429 | TUBB2A    |
| hsa-mir-429 | UBE2D1    |
| hsa-mir-429 | VEGFA     |
| hsa-mir-429 | MLLT10    |
| hsa-mir-429 | SHOC2     |
| hsa-mir-429 | YEATS4    |
| hsa-mir-429 | BAP1      |
| hsa-mir-429 | KLF11     |
| hsa-mir-429 | CDC14B    |
| hsa-mir-429 | STX16     |
| hsa-mir-429 | RTL8C     |
| hsa-mir-429 | QKI       |
| hsa-mir-429 | ONECUT2   |
| hsa-mir-429 | BAG4      |
| hsa-mir-429 | PHF14     |
| hsa-mir-429 | SECISBP2L |
| hsa-mir-429 | RASSF2    |
| hsa-mir-429 | ZEB2      |
| hsa-mir-429 | BCL2L11   |
| hsa-mir-429 | MAMLD1    |
| hsa-mir-429 | DNAJB6    |
| hsa-mir-429 | ARPC3     |
| hsa-mir-429 | ABI2      |
| hsa-mir-429 | DLC1      |
| hsa-mir-429 | SEC23A    |
| hsa-mir-429 | NCOA2     |
| hsa-mir-429 | CELF1     |
| hsa-mir-429 | SEC24A    |
| hsa-mir-429 | WASF3     |
| hsa-mir-429 | FRS2      |
| hsa-mir-429 | MALT1     |
| hsa-mir-429 | RASSF8    |

|             |          |
|-------------|----------|
| hsa-mir-429 | WDR37    |
| hsa-mir-429 | GPATCH8  |
| hsa-mir-429 | CAMSAP2  |
| hsa-mir-429 | PSD3     |
| hsa-mir-429 | ZFPM2    |
| hsa-mir-429 | OSTF1    |
| hsa-mir-429 | PABPC1   |
| hsa-mir-429 | SESN1    |
| hsa-mir-429 | KLHL20   |
| hsa-mir-429 | OSTM1    |
| hsa-mir-429 | TBK1     |
| hsa-mir-429 | CLEC2D   |
| hsa-mir-429 | ABT1     |
| hsa-mir-429 | NRBP1    |
| hsa-mir-429 | NGRN     |
| hsa-mir-429 | CRLF3    |
| hsa-mir-429 | WNT16    |
| hsa-mir-429 | CAB39    |
| hsa-mir-429 | C21orf91 |
| hsa-mir-429 | ERRFI1   |
| hsa-mir-429 | RIN2     |
| hsa-mir-429 | DDIT4    |
| hsa-mir-429 | UHRF1BP1 |
| hsa-mir-429 | INO80D   |
| hsa-mir-429 | TMEM70   |
| hsa-mir-429 | CDCA4    |
| hsa-mir-429 | VAC14    |
| hsa-mir-429 | N4BP2    |
| hsa-mir-429 | MBD5     |
| hsa-mir-429 | ERBIN    |
| hsa-mir-429 | BBX      |
| hsa-mir-429 | PPM1H    |
| hsa-mir-429 | NLGN4X   |
| hsa-mir-429 | NUFIP2   |
| hsa-mir-429 | KLHL42   |
| hsa-mir-429 | TXNDC16  |
| hsa-mir-429 | RAP2C    |
| hsa-mir-429 | C6orf47  |
| hsa-mir-429 | CACNG8   |
| hsa-mir-429 | ELMO2    |
| hsa-mir-429 | KIF13A   |
| hsa-mir-429 | ZMAT3    |
| hsa-mir-429 | PRRG4    |
| hsa-mir-429 | TAF1D    |

|             |          |
|-------------|----------|
| hsa-mir-429 | ZFHX4    |
| hsa-mir-429 | SHCBP1   |
| hsa-mir-429 | ERMP1    |
| hsa-mir-429 | CLPB     |
| hsa-mir-429 | TRIM56   |
| hsa-mir-429 | TCF7L1   |
| hsa-mir-429 | PARD6B   |
| hsa-mir-429 | UNC119B  |
| hsa-mir-429 | MTDH     |
| hsa-mir-429 | TJAP1    |
| hsa-mir-429 | TP53INP1 |
| hsa-mir-429 | DCBLD2   |
| hsa-mir-429 | FAM216B  |
| hsa-mir-429 | DENND5B  |
| hsa-mir-429 | PPP1R18  |
| hsa-mir-429 | TUBB     |
| hsa-mir-429 | ZNF621   |
| hsa-mir-429 | TMEM119  |
| hsa-mir-429 | MALAT1   |
| hsa-mir-429 | GPX8     |
| hsa-mir-429 | ANKRD33B |

---
