# Supplementary material for: Establishment and Comprehensive Analysis of Underlying microRNA-mRNA Interactive Networks in Ovarian Cancer
Source: Hindawi journal article supplement (doi:10.1155/2022/5120342), 2022-03-10
Supplement: f1 [file 5120342.f1.zip]

Table S1 DEMs between OC and normal tissue from GSE25405 dataset.

| ID          | adj.P.Val | P.Value  | t         | B       | logFC     |
|-------------|-----------|----------|-----------|---------|-----------|
| hsa-miR-99a | 2.53E-02  | 5.86E-03 | 2.87161   | -2.7746 | 2.34836   |
| hsa-miR-99a | 2.75E-02  | 6.58E-03 | 2.829139  | -2.8793 | 2.37399   |
| hsa-miR-99a | 2.75E-02  | 6.60E-03 | 2.827603  | -2.8831 | 2.329534  |
| hsa-miR-99a | 2.81E-02  | 6.78E-03 | 2.817822  | -2.907  | 2.325603  |
| hsa-miR-99a | 2.81E-02  | 6.80E-03 | 2.817068  | -2.9089 | 2.336629  |
| hsa-miR-99a | 2.83E-02  | 6.89E-03 | 2.812128  | -2.921  | 2.334549  |
| hsa-miR-99a | 2.83E-02  | 6.90E-03 | 2.811553  | -2.9224 | 2.330271  |
| hsa-miR-99a | 2.96E-02  | 7.30E-03 | 2.790699  | -2.9731 | 2.330066  |
| hsa-miR-99a | 5.55E-02  | 1.67E-02 | 2.47058   | -3.7163 | 2.209575  |
| hsa-miR-99a | 6.20E-02  | 1.95E-02 | 2.408225  | -3.8529 | 2.206868  |
| hsa-miR-99a | 6.27E-02  | 1.99E-02 | 2.40032   | -3.87   | 2.178213  |
| hsa-miR-99a | 6.31E-02  | 2.01E-02 | 2.397598  | -3.8759 | 2.144291  |
| hsa-miR-99a | 6.52E-02  | 2.09E-02 | 2.381791  | -3.9099 | 2.123934  |
| hsa-miR-99a | 6.53E-02  | 2.09E-02 | 2.380631  | -3.9124 | 2.122517  |
| hsa-miR-99a | 6.58E-02  | 2.11E-02 | 2.376212  | -3.9219 | 2.144406  |
| hsa-miR-99a | 7.47E-02  | 2.53E-02 | 2.302666  | -4.0776 | 2.089683  |
| hsa-miR-96  | 1.05E-03  | 7.65E-05 | -4.288605 | 1.2712  | -2.213402 |
| hsa-miR-96  | 1.05E-03  | 8.04E-05 | -4.273461 | 1.2233  | -2.211239 |
| hsa-miR-96  | 1.05E-03  | 8.06E-05 | -4.272901 | 1.2216  | -2.227901 |
| hsa-miR-96  | 1.06E-03  | 8.23E-05 | -4.266797 | 1.2023  | -2.147228 |
| hsa-miR-96  | 1.08E-03  | 8.85E-05 | -4.244726 | 1.1327  | -2.174318 |
| hsa-miR-96  | 1.08E-03  | 9.03E-05 | -4.238876 | 1.1143  | -2.202934 |
| hsa-miR-96  | 1.08E-03  | 9.07E-05 | -4.237492 | 1.1099  | -2.175984 |
| hsa-miR-96  | 1.13E-03  | 9.80E-05 | -4.213966 | 1.036   | -2.169404 |
| hsa-miR-96  | 1.13E-03  | 1.01E-04 | -4.206345 | 1.012   | -2.14111  |
| hsa-miR-96  | 1.13E-03  | 1.02E-04 | -4.201108 | 0.9956  | -2.178772 |
| hsa-miR-96  | 1.15E-03  | 1.07E-04 | -4.186158 | 0.9488  | -2.153154 |
| hsa-miR-96  | 1.18E-03  | 1.13E-04 | -4.169669 | 0.8973  | -2.114467 |
| hsa-miR-96  | 1.36E-03  | 1.42E-04 | -4.102105 | 0.6871  | -2.097294 |
| hsa-miR-96  | 1.36E-03  | 1.42E-04 | -4.102065 | 0.687   | -2.109547 |
| hsa-miR-96  | 1.37E-03  | 1.43E-04 | -4.098443 | 0.6758  | -2.109643 |
| hsa-miR-96  | 1.48E-03  | 1.59E-04 | -4.067311 | 0.5796  | -2.088219 |
| hsa-miR-663 | 8.35E-04  | 4.47E-05 | -4.448609 | 1.782   | -2.703652 |
| hsa-miR-663 | 9.60E-04  | 5.33E-05 | -4.396325 | 1.6142  | -2.699316 |
| hsa-miR-663 | 1.05E-03  | 7.42E-05 | -4.297553 | 1.2996  | -2.640799 |
| hsa-miR-663 | 1.05E-03  | 7.48E-05 | -4.295122 | 1.2919  | -2.68123  |
| hsa-miR-663 | 1.05E-03  | 7.75E-05 | -4.284668 | 1.2588  | -2.592667 |
| hsa-miR-663 | 1.48E-03  | 1.60E-04 | -4.065374 | 0.5736  | -2.439832 |
| hsa-miR-663 | 1.73E-03  | 1.92E-04 | -4.009379 | 0.4016  | -2.453402 |
| hsa-miR-663 | 2.95E-03  | 3.65E-04 | -3.808938 | -0.2036 | -2.548525 |
| hsa-miR-630 | 5.08E-03  | 7.34E-04 | -3.585104 | -0.8587 | -2.934175 |
| hsa-miR-630 | 5.73E-03  | 8.53E-04 | -3.53618  | -0.9987 | -2.692548 |

|                |          |          |           |         |           |
|----------------|----------|----------|-----------|---------|-----------|
| hsa-miR-630    | 7.49E-03 | 1.17E-03 | -3.430825 | -1.2962 | -2.972883 |
| hsa-miR-630    | 7.66E-03 | 1.21E-03 | -3.419872 | -1.3269 | -2.556843 |
| hsa-miR-622    | 5.19E-04 | 1.94E-05 | -4.692403 | 2.5759  | -3.29006  |
| hsa-miR-575    | 6.58E-03 | 1.00E-03 | -3.482381 | -1.1513 | -2.301284 |
| hsa-miR-497    | 2.31E-05 | 2.14E-07 | 5.954607  | 6.9025  | 3.236248  |
| hsa-miR-497    | 2.31E-05 | 2.33E-07 | 5.931803  | 6.8221  | 3.29102   |
| hsa-miR-497    | 2.31E-05 | 2.41E-07 | 5.922593  | 6.7897  | 3.266449  |
| hsa-miR-497    | 2.33E-05 | 2.93E-07 | 5.86846   | 6.5991  | 3.2562    |
| hsa-miR-497    | 2.33E-05 | 3.21E-07 | 5.843498  | 6.5113  | 3.27675   |
| hsa-miR-497    | 2.33E-05 | 3.29E-07 | 5.836947  | 6.4883  | 3.249822  |
| hsa-miR-497    | 2.33E-05 | 3.31E-07 | 5.835475  | 6.4831  | 3.281152  |
| hsa-miR-497    | 2.82E-05 | 4.29E-07 | 5.764236  | 6.2331  | 3.27486   |
| hsa-miR-497    | 8.01E-05 | 1.45E-06 | 5.428032  | 5.0627  | 3.347563  |
| hsa-miR-497    | 9.32E-05 | 1.80E-06 | 5.36719   | 4.8528  | 3.313554  |
| hsa-miR-497    | 1.21E-04 | 2.78E-06 | 5.245488  | 4.4348  | 3.470032  |
| hsa-miR-487b   | 1.45E-02 | 2.81E-03 | 3.13452   | -2.1018 | 2.532134  |
| hsa-miR-487b   | 1.79E-02 | 3.68E-03 | 3.039401  | -2.35   | 2.522726  |
| hsa-miR-455-5p | 4.00E-03 | 5.58E-04 | 3.673563  | -0.6026 | 2.091619  |
| hsa-miR-455-5p | 5.47E-03 | 8.01E-04 | 3.556385  | -0.941  | 2.140734  |
| hsa-miR-455-5p | 7.16E-03 | 1.11E-03 | 3.450156  | -1.2421 | 1.954498  |
| hsa-miR-455-5p | 8.20E-03 | 1.31E-03 | 3.39448   | -1.3976 | 1.952383  |
| hsa-miR-455-5p | 1.25E-02 | 2.27E-03 | 3.2085    | -1.9052 | 2.075203  |
| hsa-miR-455-3p | 2.14E-03 | 2.45E-04 | 3.933542  | 0.1706  | 2.082989  |
| hsa-miR-455-3p | 2.72E-03 | 3.33E-04 | 3.838004  | -0.1169 | 2.041117  |
| hsa-miR-455-3p | 3.13E-03 | 4.03E-04 | 3.777291  | -0.2976 | 2.011701  |
| hsa-miR-455-3p | 3.27E-03 | 4.26E-04 | 3.759359  | -0.3507 | 2.001349  |
| hsa-miR-455-3p | 3.29E-03 | 4.30E-04 | 3.756891  | -0.358  | 2.019615  |
| hsa-miR-455-3p | 3.34E-03 | 4.39E-04 | 3.750503  | -0.3769 | 2.015907  |
| hsa-miR-455-3p | 3.59E-03 | 4.78E-04 | 3.723023  | -0.4578 | 2.136004  |
| hsa-miR-455-3p | 3.88E-03 | 5.36E-04 | 3.686753  | -0.5641 | 1.99564   |
| hsa-miR-455-3p | 5.56E-03 | 8.21E-04 | 3.548509  | -0.9635 | 2.07976   |
| hsa-miR-455-3p | 5.97E-03 | 9.02E-04 | 3.517869  | -1.0508 | 2.061286  |
| hsa-miR-455-3p | 7.00E-03 | 1.07E-03 | 3.460098  | -1.2141 | 2.041994  |
| hsa-miR-455-3p | 9.51E-03 | 1.57E-03 | 3.333853  | -1.5651 | 2.139804  |
| hsa-miR-455-3p | 1.74E-02 | 3.57E-03 | 3.049778  | -2.3231 | 2.259633  |
| hsa-miR-429    | 7.24E-05 | 1.20E-06 | -5.480338 | 5.2436  | -2.456537 |
| hsa-miR-429    | 7.24E-05 | 1.22E-06 | -5.475165 | 5.2257  | -2.439709 |
| hsa-miR-429    | 7.92E-05 | 1.37E-06 | -5.443599 | 5.1165  | -2.397313 |
| hsa-miR-429    | 8.01E-05 | 1.47E-06 | -5.422852 | 5.0448  | -2.450823 |
| hsa-miR-429    | 8.01E-05 | 1.48E-06 | -5.421379 | 5.0397  | -2.418131 |
| hsa-miR-429    | 8.02E-05 | 1.52E-06 | -5.414952 | 5.0175  | -2.41973  |
| hsa-miR-429    | 9.68E-05 | 1.92E-06 | -5.349859 | 4.7931  | -2.373828 |
| hsa-miR-429    | 9.68E-05 | 1.95E-06 | -5.344895 | 4.776   | -2.390403 |
| hsa-miR-429    | 1.06E-04 | 2.18E-06 | -5.314383 | 4.6711  | -2.346744 |

|                |          |          |           |         |           |
|----------------|----------|----------|-----------|---------|-----------|
| hsa-miR-429    | 1.06E-04 | 2.22E-06 | -5.309179 | 4.6532  | -2.366514 |
| hsa-miR-429    | 1.07E-04 | 2.28E-06 | -5.301544 | 4.627   | -2.410816 |
| hsa-miR-429    | 1.14E-04 | 2.48E-06 | -5.277504 | 4.5445  | -2.370102 |
| hsa-miR-429    | 1.15E-04 | 2.60E-06 | -5.264168 | 4.4988  | -2.363896 |
| hsa-miR-429    | 1.29E-04 | 3.07E-06 | -5.217773 | 4.3401  | -2.360966 |
| hsa-miR-429    | 1.42E-04 | 3.52E-06 | -5.179196 | 4.2084  | -2.328723 |
| hsa-miR-429    | 1.47E-04 | 3.94E-06 | -5.147804 | 4.1015  | -2.34815  |
| hsa-miR-424    | 4.44E-11 | 6.28E-14 | 10.084927 | 21.3992 | 4.811093  |
| hsa-miR-424    | 4.44E-11 | 7.73E-14 | 10.025246 | 21.1996 | 4.869215  |
| hsa-miR-424    | 4.44E-11 | 7.94E-14 | 10.017648 | 21.1742 | 4.819171  |
| hsa-miR-424    | 4.44E-11 | 1.11E-13 | 9.921201  | 20.8506 | 4.838647  |
| hsa-miR-424    | 4.44E-11 | 1.26E-13 | 9.885504  | 20.7305 | 4.885638  |
| hsa-miR-424    | 4.44E-11 | 1.26E-13 | 9.884573  | 20.7274 | 4.821637  |
| hsa-miR-424    | 4.44E-11 | 1.28E-13 | 9.881404  | 20.7167 | 4.917572  |
| hsa-miR-424    | 1.38E-08 | 4.54E-11 | 8.246468  | 15.0671 | 5.138311  |
| hsa-miR-424    | 5.41E-08 | 2.17E-10 | 7.820638  | 13.5572 | 5.205727  |
| hsa-miR-371-5p | 3.06E-03 | 3.87E-04 | -3.790497 | -0.2585 | -2.573689 |
| hsa-miR-34c-5p | 6.75E-02 | 2.20E-02 | 2.360329  | -3.9559 | 2.289714  |
| hsa-miR-34b*   | 4.94E-02 | 1.41E-02 | 2.539017  | -3.5633 | 1.661409  |
| hsa-miR-34b*   | 6.27E-02 | 1.98E-02 | 2.401906  | -3.8666 | 1.552538  |
| hsa-miR-34b*   | 6.59E-02 | 2.12E-02 | 2.37463   | -3.9253 | 1.573509  |
| hsa-miR-34b*   | 6.81E-02 | 2.22E-02 | 2.356544  | -3.9639 | 1.562182  |
| hsa-miR-34b*   | 6.94E-02 | 2.29E-02 | 2.343903  | -3.9908 | 1.5128    |
| hsa-miR-34b*   | 7.13E-02 | 2.38E-02 | 2.32801   | -4.0244 | 1.568706  |
| hsa-miR-34b*   | 7.85E-02 | 2.68E-02 | 2.278118  | -4.1287 | 1.521983  |
| hsa-miR-34b*   | 8.39E-02 | 2.91E-02 | 2.24251   | -4.202  | 1.519791  |
| hsa-miR-342-3p | 3.66E-02 | 9.32E-03 | 2.698496  | -3.1942 | 1.526909  |
| hsa-miR-29a    | 9.33E-03 | 1.53E-03 | 3.34276   | -1.5406 | 1.878239  |
| hsa-miR-29a    | 1.04E-02 | 1.75E-03 | 3.295861  | -1.669  | 1.887923  |
| hsa-miR-29a    | 1.04E-02 | 1.76E-03 | 3.295061  | -1.6712 | 1.895419  |
| hsa-miR-29a    | 1.05E-02 | 1.80E-03 | 3.287186  | -1.6927 | 1.880301  |
| hsa-miR-29a    | 1.19E-02 | 2.11E-03 | 3.23257   | -1.8405 | 1.81478   |
| hsa-miR-29a    | 1.22E-02 | 2.18E-03 | 3.222054  | -1.8688 | 1.821982  |
| hsa-miR-29a    | 1.22E-02 | 2.19E-03 | 3.219961  | -1.8744 | 1.831985  |
| hsa-miR-29a    | 1.82E-02 | 3.75E-03 | 3.032058  | -2.3689 | 1.841247  |
| hsa-miR-29a    | 2.06E-02 | 4.40E-03 | 2.97514   | -2.5146 | 1.779915  |
| hsa-miR-29a    | 2.10E-02 | 4.51E-03 | 2.9666    | -2.5363 | 1.809819  |
| hsa-miR-29a    | 2.20E-02 | 4.78E-03 | 2.945331  | -2.5901 | 1.80895   |
| hsa-miR-29a    | 2.40E-02 | 5.41E-03 | 2.900506  | -2.7027 | 1.794263  |
| hsa-miR-29a    | 2.43E-02 | 5.58E-03 | 2.889359  | -2.7305 | 2.121966  |
| hsa-miR-29a    | 2.75E-02 | 6.59E-03 | 2.828204  | -2.8816 | 1.748034  |
| hsa-miR-29a    | 3.29E-02 | 8.28E-03 | 2.743131  | -3.0879 | 1.942102  |
| hsa-miR-29a    | 4.75E-02 | 1.33E-02 | 2.562683  | -3.5096 | 2.149862  |
| hsa-miR-27b    | 7.16E-04 | 3.48E-05 | 4.522549  | 2.0209  | 2.518803  |

|               |          |          |          |         |          |
|---------------|----------|----------|----------|---------|----------|
| hsa-miR-27b   | 7.28E-04 | 3.61E-05 | 4.511516 | 1.9852  | 2.575559 |
| hsa-miR-27b   | 7.95E-04 | 4.12E-05 | 4.472372 | 1.8586  | 2.440305 |
| hsa-miR-27b   | 8.13E-04 | 4.32E-05 | 4.458823 | 1.8149  | 2.464547 |
| hsa-miR-27b   | 8.67E-04 | 4.67E-05 | 4.435375 | 1.7395  | 2.460317 |
| hsa-miR-27b   | 9.54E-04 | 5.26E-05 | 4.400446 | 1.6274  | 2.483338 |
| hsa-miR-27b   | 9.63E-04 | 5.39E-05 | 4.393074 | 1.6038  | 2.515143 |
| hsa-miR-27b   | 9.76E-04 | 5.66E-05 | 4.378302 | 1.5565  | 2.46171  |
| hsa-miR-27b   | 9.85E-04 | 5.77E-05 | 4.372865 | 1.5392  | 2.518375 |
| hsa-miR-27b   | 9.85E-04 | 5.83E-05 | 4.36962  | 1.5288  | 2.487885 |
| hsa-miR-27b   | 9.85E-04 | 6.00E-05 | 4.361173 | 1.5018  | 2.41716  |
| hsa-miR-27b   | 1.02E-03 | 6.33E-05 | 4.345336 | 1.4514  | 2.42269  |
| hsa-miR-27b   | 1.05E-03 | 6.78E-05 | 4.324447 | 1.3849  | 2.405948 |
| hsa-miR-27b   | 1.05E-03 | 7.28E-05 | 4.303446 | 1.3182  | 2.399966 |
| hsa-miR-27b   | 1.05E-03 | 7.54E-05 | 4.293049 | 1.2853  | 2.39812  |
| hsa-miR-27b   | 2.35E-03 | 2.77E-04 | 3.895375 | 0.0553  | 2.769597 |
| hsa-miR-26b   | 8.89E-02 | 3.14E-02 | 2.209975 | -4.2682 | 1.580262 |
| hsa-miR-26b   | 1.03E-01 | 3.74E-02 | 2.135212 | -4.4172 | 1.541311 |
| hsa-miR-26a   | 4.18E-02 | 1.12E-02 | 2.628965 | -3.3573 | 1.501223 |
| hsa-miR-24-1* | 7.15E-04 | 3.38E-05 | 4.530455 | 2.0466  | 2.299003 |
| hsa-miR-24-1* | 7.84E-04 | 4.03E-05 | 4.479    | 1.88    | 2.499743 |
| hsa-miR-24-1* | 1.25E-03 | 1.21E-04 | 4.14963  | 0.8348  | 2.289638 |
| hsa-miR-23b   | 1.05E-03 | 7.57E-05 | 4.291629 | 1.2808  | 2.511477 |
| hsa-miR-23b   | 1.05E-03 | 7.82E-05 | 4.281844 | 1.2498  | 2.530443 |
| hsa-miR-23b   | 1.06E-03 | 8.35E-05 | 4.262121 | 1.1875  | 2.513339 |
| hsa-miR-23b   | 1.08E-03 | 8.89E-05 | 4.243344 | 1.1283  | 2.483066 |
| hsa-miR-23b   | 1.13E-03 | 9.87E-05 | 4.211781 | 1.0291  | 2.620661 |
| hsa-miR-23b   | 1.13E-03 | 1.04E-04 | 4.196398 | 0.9809  | 2.456697 |
| hsa-miR-23b   | 1.13E-03 | 1.05E-04 | 4.194068 | 0.9736  | 2.448701 |
| hsa-miR-23b   | 1.16E-03 | 1.10E-04 | 4.180211 | 0.9302  | 2.451388 |
| hsa-miR-23b   | 1.16E-03 | 1.10E-04 | 4.178547 | 0.925   | 2.457905 |
| hsa-miR-23b   | 1.17E-03 | 1.12E-04 | 4.174639 | 0.9128  | 2.467665 |
| hsa-miR-23b   | 1.21E-03 | 1.17E-04 | 4.160922 | 0.87    | 2.445011 |
| hsa-miR-23b   | 1.27E-03 | 1.25E-04 | 4.140894 | 0.8076  | 2.430738 |
| hsa-miR-23b   | 1.27E-03 | 1.26E-04 | 4.137587 | 0.7973  | 2.449157 |
| hsa-miR-23b   | 1.31E-03 | 1.31E-04 | 4.12583  | 0.7607  | 2.425069 |
| hsa-miR-23b   | 1.33E-03 | 1.34E-04 | 4.118613 | 0.7383  | 2.431312 |
| hsa-miR-23b   | 1.51E-03 | 1.64E-04 | 4.056562 | 0.5465  | 2.704514 |
| hsa-miR-221   | 4.57E-02 | 1.25E-02 | 2.585144 | -3.4583 | 1.698537 |
| hsa-miR-221   | 5.98E-02 | 1.86E-02 | 2.427548 | -3.8109 | 1.649216 |
| hsa-miR-221   | 6.64E-02 | 2.15E-02 | 2.369698 | -3.9358 | 1.591325 |
| hsa-miR-221   | 6.75E-02 | 2.20E-02 | 2.360398 | -3.9557 | 1.539665 |
| hsa-miR-221   | 6.84E-02 | 2.24E-02 | 2.352871 | -3.9717 | 1.709009 |
| hsa-miR-221   | 7.13E-02 | 2.36E-02 | 2.331305 | -4.0175 | 1.505908 |
| hsa-miR-221   | 7.15E-02 | 2.38E-02 | 2.326684 | -4.0272 | 1.529319 |

|               |          |          |           |         |           |
|---------------|----------|----------|-----------|---------|-----------|
| hsa-miR-221   | 7.77E-02 | 2.64E-02 | 2.283501  | -4.1176 | 1.556503  |
| hsa-miR-221   | 8.40E-02 | 2.92E-02 | 2.241102  | -4.2049 | 1.585805  |
| hsa-miR-214   | 1.02E-03 | 6.35E-05 | 4.34443   | 1.4485  | 2.835438  |
| hsa-miR-214   | 1.03E-03 | 6.45E-05 | 4.339773  | 1.4337  | 2.972057  |
| hsa-miR-214   | 1.05E-03 | 7.19E-05 | 4.307171  | 1.3301  | 2.843497  |
| hsa-miR-214   | 1.05E-03 | 7.76E-05 | 4.284236  | 1.2574  | 2.811937  |
| hsa-miR-214   | 1.05E-03 | 7.91E-05 | 4.278708  | 1.2399  | 2.847831  |
| hsa-miR-214   | 1.05E-03 | 8.03E-05 | 4.2741    | 1.2254  | 2.804516  |
| hsa-miR-214   | 1.07E-03 | 8.58E-05 | 4.254198  | 1.1625  | 2.84275   |
| hsa-miR-214   | 1.07E-03 | 8.60E-05 | 4.253543  | 1.1605  | 2.83326   |
| hsa-miR-214   | 1.10E-03 | 9.40E-05 | 4.226474  | 1.0752  | 2.875281  |
| hsa-miR-214   | 1.13E-03 | 1.01E-04 | 4.20621   | 1.0116  | 2.957051  |
| hsa-miR-214   | 1.13E-03 | 1.01E-04 | 4.205154  | 1.0083  | 2.925236  |
| hsa-miR-214   | 1.23E-03 | 1.19E-04 | 4.156172  | 0.8552  | 2.888848  |
| hsa-miR-214   | 1.27E-03 | 1.26E-04 | 4.137572  | 0.7972  | 2.914621  |
| hsa-miR-214   | 1.31E-03 | 1.32E-04 | 4.124339  | 0.7561  | 2.888099  |
| hsa-miR-214   | 1.33E-03 | 1.35E-04 | 4.117861  | 0.736   | 2.859381  |
| hsa-miR-214   | 1.41E-03 | 1.50E-04 | 4.085551  | 0.6359  | 2.862172  |
| hsa-miR-20a*  | 1.14E-01 | 4.25E-02 | 2.078364  | -4.5276 | 1.533156  |
| hsa-miR-205   | 5.41E-08 | 2.23E-10 | -7.813646 | 13.5324 | -6.035633 |
| hsa-miR-205   | 1.12E-07 | 5.09E-10 | -7.589614 | 12.734  | -5.468426 |
| hsa-miR-204   | 4.26E-03 | 5.97E-04 | 3.651655  | -0.6663 | 3.678198  |
| hsa-miR-203   | 7.06E-04 | 3.31E-05 | -4.536653 | 2.0667  | -2.883104 |
| hsa-miR-203   | 1.48E-03 | 1.59E-04 | -4.067358 | 0.5798  | -2.68355  |
| hsa-miR-203   | 1.57E-03 | 1.71E-04 | -4.043966 | 0.5077  | -2.685294 |
| hsa-miR-203   | 2.98E-03 | 3.72E-04 | -3.802426 | -0.223  | -2.513072 |
| hsa-miR-203   | 3.21E-03 | 4.17E-04 | -3.766704 | -0.329  | -2.44862  |
| hsa-miR-203   | 3.58E-03 | 4.74E-04 | -3.725757 | -0.4497 | -2.575182 |
| hsa-miR-203   | 3.81E-03 | 5.22E-04 | -3.694896 | -0.5403 | -2.454415 |
| hsa-miR-203   | 5.70E-03 | 8.47E-04 | -3.538396 | -0.9924 | -2.505521 |
| hsa-miR-203   | 5.77E-03 | 8.65E-04 | -3.531607 | -1.0117 | -2.471119 |
| hsa-miR-203   | 7.29E-03 | 1.13E-03 | -3.443195 | -1.2616 | -2.417053 |
| hsa-miR-203   | 8.43E-03 | 1.36E-03 | -3.3828   | -1.43   | -2.403972 |
| hsa-miR-200b* | 9.76E-04 | 5.57E-05 | -4.383272 | 1.5724  | -2.192422 |
| hsa-miR-200b* | 1.13E-03 | 9.97E-05 | -4.208841 | 1.0199  | -2.033885 |
| hsa-miR-200b* | 6.92E-03 | 1.06E-03 | -3.465056 | -1.2002 | -2.12937  |
| hsa-miR-200b  | 1.15E-04 | 2.59E-06 | -5.265381 | 4.503   | -2.253171 |
| hsa-miR-200b  | 1.42E-04 | 3.55E-06 | -5.1769   | 4.2006  | -2.182754 |
| hsa-miR-200b  | 1.42E-04 | 3.63E-06 | -5.170867 | 4.18    | -2.191008 |
| hsa-miR-200b  | 1.46E-04 | 3.80E-06 | -5.158394 | 4.1375  | -2.216388 |
| hsa-miR-200b  | 1.47E-04 | 3.91E-06 | -5.149855 | 4.1085  | -2.183533 |
| hsa-miR-200b  | 1.64E-04 | 4.52E-06 | -5.109144 | 3.9701  | -2.179142 |
| hsa-miR-200b  | 2.96E-04 | 1.01E-05 | -4.880631 | 3.2003  | -2.140895 |
| hsa-miR-200b  | 5.83E-04 | 2.39E-05 | -4.63255  | 2.3794  | -2.01034  |

|                 |          |          |           |         |           |
|-----------------|----------|----------|-----------|---------|-----------|
| hsa-miR-200b    | 6.23E-04 | 2.75E-05 | -4.591299 | 2.2445  | -2.003192 |
| hsa-miR-200b    | 6.32E-04 | 2.84E-05 | -4.58213  | 2.2146  | -2.003496 |
| hsa-miR-200a*   | 1.13E-05 | 5.60E-08 | -6.319394 | 8.195   | -3.509104 |
| hsa-miR-200a*   | 2.89E-05 | 4.52E-07 | -5.749456 | 6.1813  | -3.30919  |
| hsa-miR-200a*   | 4.35E-05 | 6.98E-07 | -5.629987 | 5.7638  | -3.04478  |
| hsa-miR-200a*   | 9.15E-04 | 4.97E-05 | -4.417261 | 1.6813  | -2.665038 |
| hsa-miR-200a    | 9.76E-04 | 5.65E-05 | -4.378875 | 1.5584  | -2.015141 |
| hsa-miR-200a    | 1.05E-03 | 7.59E-05 | -4.290773 | 1.2781  | -2.010584 |
| hsa-miR-200a    | 1.07E-03 | 8.72E-05 | -4.249114 | 1.1465  | -2.000524 |
| hsa-miR-199b-5p | 7.67E-04 | 3.91E-05 | 4.487807  | 1.9085  | 3.157549  |
| hsa-miR-199b-5p | 8.13E-04 | 4.30E-05 | 4.459596  | 1.8174  | 3.295318  |
| hsa-miR-199b-5p | 9.76E-04 | 5.59E-05 | 4.382158  | 1.5689  | 3.199582  |
| hsa-miR-199b-5p | 9.85E-04 | 5.91E-05 | 4.36579   | 1.5166  | 3.181438  |
| hsa-miR-199b-5p | 9.85E-04 | 6.01E-05 | 4.36039   | 1.4993  | 3.15713   |
| hsa-miR-199b-5p | 1.03E-03 | 6.50E-05 | 4.3372    | 1.4255  | 3.26486   |
| hsa-miR-199b-5p | 1.05E-03 | 7.19E-05 | 4.30707   | 1.3297  | 3.147219  |
| hsa-miR-199b-5p | 1.07E-03 | 8.69E-05 | 4.250162  | 1.1498  | 3.151959  |
| hsa-miR-199b-5p | 1.10E-03 | 9.30E-05 | 4.229777  | 1.0856  | 3.296424  |
| hsa-miR-199b-5p | 1.13E-03 | 1.04E-04 | 4.194889  | 0.9761  | 3.116649  |
| hsa-miR-199b-5p | 1.13E-03 | 1.05E-04 | 4.194484  | 0.9749  | 3.238275  |
| hsa-miR-199b-5p | 1.15E-03 | 1.08E-04 | 4.184386  | 0.9433  | 3.098567  |
| hsa-miR-199b-5p | 1.26E-03 | 1.23E-04 | 4.144395  | 0.8185  | 3.240427  |
| hsa-miR-199b-5p | 1.38E-03 | 1.46E-04 | 4.093469  | 0.6604  | 3.53329   |
| hsa-miR-199b-5p | 2.62E-03 | 3.16E-04 | 3.854323  | -0.0681 | 3.313799  |
| hsa-miR-199a-5p | 1.08E-03 | 8.86E-05 | 4.2446    | 1.1323  | 2.963491  |
| hsa-miR-199a-5p | 1.13E-03 | 1.02E-04 | 4.200975  | 0.9952  | 2.86713   |
| hsa-miR-199a-5p | 1.13E-03 | 1.04E-04 | 4.194768  | 0.9758  | 2.86181   |
| hsa-miR-199a-5p | 1.26E-03 | 1.23E-04 | 4.145363  | 0.8215  | 2.850378  |
| hsa-miR-199a-5p | 1.36E-03 | 1.42E-04 | 4.100742  | 0.6829  | 2.822637  |
| hsa-miR-199a-5p | 1.43E-03 | 1.53E-04 | 4.079469  | 0.6171  | 2.79332   |
| hsa-miR-199a-5p | 1.70E-03 | 1.88E-04 | 4.015508  | 0.4204  | 2.75154   |
| hsa-miR-199a-5p | 1.88E-03 | 2.11E-04 | 3.979339  | 0.3098  | 2.875994  |
| hsa-miR-199a-5p | 2.08E-03 | 2.36E-04 | 3.944519  | 0.2039  | 2.927027  |
| hsa-miR-199a-5p | 2.08E-03 | 2.37E-04 | 3.943741  | 0.2016  | 2.958403  |
| hsa-miR-199a-5p | 2.67E-03 | 3.24E-04 | 3.846058  | -0.0928 | 2.722203  |
| hsa-miR-199a-5p | 2.92E-03 | 3.58E-04 | 3.815019  | -0.1855 | 2.793394  |
| hsa-miR-199a-5p | 2.97E-03 | 3.70E-04 | 3.80453   | -0.2168 | 2.847011  |
| hsa-miR-199a-5p | 3.08E-03 | 3.91E-04 | 3.786687  | -0.2698 | 3.233942  |
| hsa-miR-199a-5p | 3.66E-03 | 4.93E-04 | 3.713411  | -0.486  | 3.278034  |
| hsa-miR-199a-5p | 5.44E-03 | 7.93E-04 | 3.559907  | -0.9309 | 3.250844  |
| hsa-miR-199a-3p | 9.42E-04 | 5.16E-05 | 4.406154  | 1.6457  | 2.800512  |
| hsa-miR-199a-3p | 9.85E-04 | 5.90E-05 | 4.366113  | 1.5176  | 2.794476  |
| hsa-miR-199a-3p | 1.04E-03 | 6.60E-05 | 4.332824  | 1.4115  | 2.792669  |
| hsa-miR-199a-3p | 1.05E-03 | 6.75E-05 | 4.325892  | 1.3895  | 2.794922  |

|                 |          |          |          |         |          |
|-----------------|----------|----------|----------|---------|----------|
| hsa-miR-199a-3p | 1.05E-03 | 7.28E-05 | 4.303508 | 1.3184  | 2.792328 |
| hsa-miR-199a-3p | 1.05E-03 | 7.29E-05 | 4.303167 | 1.3174  | 2.76694  |
| hsa-miR-199a-3p | 1.05E-03 | 7.65E-05 | 4.288471 | 1.2708  | 2.743717 |
| hsa-miR-199a-3p | 1.05E-03 | 7.77E-05 | 4.283689 | 1.2557  | 2.754817 |
| hsa-miR-199a-3p | 1.05E-03 | 7.91E-05 | 4.278557 | 1.2394  | 2.758932 |
| hsa-miR-199a-3p | 1.05E-03 | 8.07E-05 | 4.272464 | 1.2202  | 2.741261 |
| hsa-miR-199a-3p | 1.06E-03 | 8.40E-05 | 4.260636 | 1.1828  | 2.775951 |
| hsa-miR-199a-3p | 1.07E-03 | 8.49E-05 | 4.25736  | 1.1725  | 2.762768 |
| hsa-miR-199a-3p | 1.07E-03 | 8.51E-05 | 4.256457 | 1.1697  | 2.748775 |
| hsa-miR-199a-3p | 2.25E-03 | 2.61E-04 | 3.913932 | 0.1113  | 3.050997 |
| hsa-miR-199a-3p | 2.56E-03 | 3.04E-04 | 3.865782 | -0.0337 | 3.068285 |
| hsa-miR-199a-3p | 2.96E-03 | 3.68E-04 | 3.806368 | -0.2113 | 3.146072 |
| hsa-miR-196b    | 2.95E-03 | 3.64E-04 | 3.809646 | -0.2015 | 2.650818 |
| hsa-miR-196b    | 3.16E-03 | 4.08E-04 | 3.773243 | -0.3096 | 2.73387  |
| hsa-miR-196b    | 3.19E-03 | 4.13E-04 | 3.769254 | -0.3214 | 2.650166 |
| hsa-miR-196b    | 3.60E-03 | 4.82E-04 | 3.720626 | -0.4648 | 2.673536 |
| hsa-miR-196b    | 3.64E-03 | 4.88E-04 | 3.716464 | -0.477  | 2.47655  |
| hsa-miR-196b    | 3.68E-03 | 4.98E-04 | 3.709694 | -0.4969 | 2.734634 |
| hsa-miR-196b    | 3.68E-03 | 4.99E-04 | 3.709595 | -0.4972 | 2.653666 |
| hsa-miR-196b    | 3.79E-03 | 5.18E-04 | 3.697386 | -0.533  | 2.689467 |
| hsa-miR-196b    | 3.88E-03 | 5.36E-04 | 3.686165 | -0.5658 | 2.431484 |
| hsa-miR-196b    | 3.88E-03 | 5.38E-04 | 3.685416 | -0.568  | 2.430359 |
| hsa-miR-196b    | 3.98E-03 | 5.53E-04 | 3.676413 | -0.5943 | 2.688378 |
| hsa-miR-196b    | 4.90E-03 | 7.01E-04 | 3.599772 | -0.8165 | 2.547108 |
| hsa-miR-196b    | 4.90E-03 | 7.03E-04 | 3.598822 | -0.8192 | 2.468688 |
| hsa-miR-196b    | 5.47E-03 | 7.99E-04 | 3.557203 | -0.9387 | 2.548994 |
| hsa-miR-196b    | 5.52E-03 | 8.13E-04 | 3.5517   | -0.9544 | 2.504008 |
| hsa-miR-196b    | 7.06E-03 | 1.09E-03 | 3.456666 | -1.2238 | 2.569118 |
| hsa-miR-195     | 2.31E-05 | 1.28E-07 | 6.095538 | 7.4005  | 3.5281   |
| hsa-miR-195     | 2.31E-05 | 1.47E-07 | 6.057179 | 7.2648  | 3.497744 |
| hsa-miR-195     | 2.31E-05 | 1.69E-07 | 6.018591 | 7.1284  | 3.568193 |
| hsa-miR-195     | 2.31E-05 | 1.79E-07 | 6.003047 | 7.0735  | 3.462958 |
| hsa-miR-195     | 2.31E-05 | 1.84E-07 | 5.996239 | 7.0494  | 3.458596 |
| hsa-miR-195     | 2.31E-05 | 2.08E-07 | 5.962748 | 6.9312  | 3.465683 |
| hsa-miR-195     | 2.31E-05 | 2.11E-07 | 5.958794 | 6.9173  | 3.497818 |
| hsa-miR-195     | 2.31E-05 | 2.45E-07 | 5.91804  | 6.7736  | 3.641941 |
| hsa-miR-195     | 2.31E-05 | 2.51E-07 | 5.910641 | 6.7476  | 3.613125 |
| hsa-miR-195     | 2.31E-05 | 2.58E-07 | 5.903567 | 6.7226  | 3.645202 |
| hsa-miR-195     | 2.31E-05 | 2.58E-07 | 5.903157 | 6.7212  | 3.480643 |
| hsa-miR-195     | 2.31E-05 | 2.66E-07 | 5.894965 | 6.6924  | 3.636366 |
| hsa-miR-195     | 2.33E-05 | 2.95E-07 | 5.866968 | 6.5938  | 3.632398 |
| hsa-miR-195     | 2.33E-05 | 3.03E-07 | 5.859148 | 6.5663  | 3.656972 |
| hsa-miR-195     | 2.33E-05 | 3.35E-07 | 5.831759 | 6.4701  | 3.631321 |
| hsa-miR-195     | 2.72E-05 | 4.03E-07 | 5.781552 | 6.2938  | 3.657968 |

|                |          |          |           |         |           |
|----------------|----------|----------|-----------|---------|-----------|
| hsa-miR-183    | 5.44E-04 | 2.13E-05 | -4.6662   | 2.4897  | -2.76531  |
| hsa-miR-183    | 6.58E-04 | 3.03E-05 | -4.562431 | 2.1505  | -2.712378 |
| hsa-miR-183    | 7.97E-04 | 4.16E-05 | -4.469403 | 1.8491  | -2.576787 |
| hsa-miR-183    | 9.85E-04 | 6.00E-05 | -4.360901 | 1.501   | -2.612221 |
| hsa-miR-183    | 1.05E-03 | 6.95E-05 | -4.317134 | 1.3617  | -2.640136 |
| hsa-miR-183    | 1.05E-03 | 7.27E-05 | -4.303818 | 1.3194  | -2.573601 |
| hsa-miR-183    | 1.12E-03 | 9.60E-05 | -4.220409 | 1.0562  | -2.52747  |
| hsa-miR-183    | 1.03E-02 | 1.72E-03 | -3.302388 | -1.6512 | -2.699138 |
| hsa-miR-183    | 3.22E-02 | 8.06E-03 | -2.753624 | -3.0627 | -2.280852 |
| hsa-miR-152    | 4.10E-04 | 1.50E-05 | 4.767068  | 2.8225  | 2.681952  |
| hsa-miR-145*   | 5.83E-04 | 2.34E-05 | 4.638077  | 2.3975  | 3.411296  |
| hsa-miR-145*   | 5.89E-04 | 2.47E-05 | 4.622401  | 2.3462  | 3.259305  |
| hsa-miR-145*   | 1.04E-03 | 6.65E-05 | 4.330348  | 1.4037  | 3.638321  |
| hsa-miR-145    | 3.69E-04 | 1.31E-05 | 4.805273  | 2.9492  | 3.529882  |
| hsa-miR-145    | 4.12E-04 | 1.52E-05 | 4.762295  | 2.8067  | 3.439829  |
| hsa-miR-145    | 5.21E-04 | 1.98E-05 | 4.687024  | 2.5582  | 3.419397  |
| hsa-miR-145    | 5.27E-04 | 2.04E-05 | 4.678285  | 2.5295  | 3.537617  |
| hsa-miR-145    | 5.45E-04 | 2.15E-05 | 4.662662  | 2.4781  | 3.425174  |
| hsa-miR-145    | 5.83E-04 | 2.36E-05 | 4.635859  | 2.3902  | 3.484947  |
| hsa-miR-145    | 6.52E-04 | 2.95E-05 | 4.570705  | 2.1774  | 3.440897  |
| hsa-miR-145    | 6.56E-04 | 3.00E-05 | 4.56607   | 2.1623  | 3.400531  |
| hsa-miR-145    | 7.06E-04 | 3.29E-05 | 4.538806  | 2.0737  | 3.451134  |
| hsa-miR-145    | 7.16E-04 | 3.46E-05 | 4.524022  | 2.0257  | 3.348853  |
| hsa-miR-145    | 7.16E-04 | 3.47E-05 | 4.522999  | 2.0224  | 3.406042  |
| hsa-miR-145    | 7.28E-04 | 3.63E-05 | 4.510092  | 1.9806  | 3.45698   |
| hsa-miR-145    | 7.37E-04 | 3.70E-05 | 4.504204  | 1.9615  | 3.361717  |
| hsa-miR-145    | 7.50E-04 | 3.80E-05 | 4.496605  | 1.9369  | 3.345072  |
| hsa-miR-145    | 1.05E-03 | 7.71E-05 | 4.286167  | 1.2635  | 3.704853  |
| hsa-miR-145    | 1.06E-03 | 8.32E-05 | 4.263175  | 1.1909  | 3.725648  |
| hsa-miR-143    | 1.39E-04 | 3.37E-06 | 5.192139  | 4.2526  | 3.445394  |
| hsa-miR-143    | 2.08E-04 | 6.16E-06 | 5.021461  | 3.6733  | 3.388836  |
| hsa-miR-143    | 2.08E-04 | 6.43E-06 | 5.009146  | 3.6318  | 3.366629  |
| hsa-miR-143    | 2.08E-04 | 6.48E-06 | 5.007238  | 3.6253  | 3.341758  |
| hsa-miR-143    | 2.08E-04 | 6.49E-06 | 5.006822  | 3.6239  | 3.363404  |
| hsa-miR-143    | 2.33E-04 | 7.52E-06 | 4.964868  | 3.4827  | 3.325029  |
| hsa-miR-143    | 2.33E-04 | 7.66E-06 | 4.959506  | 3.4646  | 3.387763  |
| hsa-miR-143    | 2.42E-04 | 8.07E-06 | 4.944554  | 3.4144  | 3.311191  |
| hsa-miR-140-5p | 1.23E-04 | 2.88E-06 | 5.235974  | 4.4023  | 2.197935  |
| hsa-miR-140-5p | 1.52E-04 | 4.11E-06 | 5.135698  | 4.0603  | 2.197296  |
| hsa-miR-140-5p | 1.66E-04 | 4.65E-06 | 5.101372  | 3.9437  | 2.185884  |
| hsa-miR-140-5p | 1.83E-04 | 5.19E-06 | 5.069976  | 3.8373  | 2.111012  |
| hsa-miR-140-5p | 1.88E-04 | 5.41E-06 | 5.058106  | 3.7971  | 2.157625  |
| hsa-miR-140-5p | 1.90E-04 | 5.53E-06 | 5.051835  | 3.7759  | 2.176226  |
| hsa-miR-140-5p | 2.32E-04 | 7.35E-06 | 4.971343  | 3.5044  | 2.188602  |



|                |          |          |           |         |           |
|----------------|----------|----------|-----------|---------|-----------|
| hsa-miR-140-5p | 2.33E-04 | 7.58E-06 | 4.962558  | 3.4749  | 2.149812  |
| hsa-miR-140-5p | 2.95E-04 | 9.96E-06 | 4.884509  | 3.2133  | 2.114042  |
| hsa-miR-140-5p | 3.15E-04 | 1.10E-05 | 4.857107  | 3.1218  | 2.134614  |
| hsa-miR-140-5p | 3.15E-04 | 1.10E-05 | 4.855592  | 3.1167  | 2.144421  |
| hsa-miR-140-5p | 3.83E-04 | 1.39E-05 | 4.789435  | 2.8966  | 2.136694  |
| hsa-miR-140-5p | 5.21E-04 | 1.99E-05 | 4.684787  | 2.5508  | 2.130105  |
| hsa-miR-140-5p | 5.89E-04 | 2.46E-05 | 4.624017  | 2.3514  | 2.226147  |
| hsa-miR-140-5p | 6.23E-04 | 2.77E-05 | 4.589273  | 2.2379  | 2.29174   |
| hsa-miR-140-5p | 1.57E-03 | 1.71E-04 | 4.044339  | 0.5089  | 2.303423  |
| hsa-miR-140-3p | 1.73E-03 | 1.91E-04 | 4.010104  | 0.4038  | 2.018462  |
| hsa-miR-140-3p | 1.85E-03 | 2.07E-04 | 3.985955  | 0.33    | 1.982043  |
| hsa-miR-140-3p | 2.04E-03 | 2.29E-04 | 3.953805  | 0.2321  | 1.965727  |
| hsa-miR-140-3p | 2.05E-03 | 2.32E-04 | 3.950289  | 0.2214  | 1.949859  |
| hsa-miR-140-3p | 2.19E-03 | 2.53E-04 | 3.923198  | 0.1393  | 1.977199  |
| hsa-miR-140-3p | 2.28E-03 | 2.66E-04 | 3.90747   | 0.0918  | 1.969032  |
| hsa-miR-140-3p | 2.40E-03 | 2.85E-04 | 3.886587  | 0.0288  | 1.92645   |
| hsa-miR-140-3p | 2.61E-03 | 3.12E-04 | 3.857715  | -0.0579 | 1.912603  |
| hsa-miR-136    | 2.31E-05 | 1.59E-07 | 6.035824  | 7.1893  | 3.12092   |
| hsa-miR-135b   | 6.03E-04 | 2.63E-05 | -4.604015 | 2.286   | -3.417126 |
| hsa-miR-135b   | 1.05E-03 | 7.22E-05 | -4.305875 | 1.326   | -2.921705 |
| hsa-miR-135b   | 1.05E-03 | 7.62E-05 | -4.28977  | 1.2749  | -2.90218  |
| hsa-miR-135b   | 1.05E-03 | 7.68E-05 | -4.287426 | 1.2675  | -2.945579 |
| hsa-miR-135b   | 1.05E-03 | 7.98E-05 | -4.275949 | 1.2312  | -2.815989 |
| hsa-miR-135b   | 1.06E-03 | 8.20E-05 | -4.26761  | 1.2049  | -2.777673 |
| hsa-miR-135b   | 1.13E-03 | 9.69E-05 | -4.217492 | 1.047   | -2.718382 |
| hsa-miR-135b   | 1.13E-03 | 1.04E-04 | -4.196124 | 0.98    | -2.8425   |
| hsa-miR-135b   | 1.14E-03 | 1.06E-04 | -4.190396 | 0.9621  | -2.716756 |
| hsa-miR-135b   | 1.36E-03 | 1.38E-04 | -4.109595 | 0.7104  | -2.695124 |
| hsa-miR-135b   | 1.36E-03 | 1.40E-04 | -4.106179 | 0.6998  | -2.6942   |
| hsa-miR-135b   | 1.36E-03 | 1.41E-04 | -4.103759 | 0.6923  | -2.705733 |
| hsa-miR-135b   | 1.40E-03 | 1.48E-04 | -4.08927  | 0.6474  | -2.681903 |
| hsa-miR-135b   | 1.51E-03 | 1.63E-04 | -4.058968 | 0.5539  | -2.702212 |
| hsa-miR-135b   | 2.32E-03 | 2.73E-04 | -3.900089 | 0.0695  | -2.576923 |
| hsa-miR-135b   | 2.95E-03 | 3.65E-04 | -3.808593 | -0.2047 | -2.620982 |
| hsa-miR-135a*  | 2.08E-04 | 6.49E-06 | -5.00669  | 3.6235  | -3.392195 |
| hsa-miR-135a*  | 3.69E-04 | 1.32E-05 | -4.803927 | 2.9447  | -2.732912 |
| hsa-miR-135a*  | 1.13E-03 | 9.81E-05 | -4.213892 | 1.0357  | -2.529884 |
| hsa-miR-132*   | 3.10E-03 | 3.96E-04 | 3.783056  | -0.2805 | 1.574876  |
| hsa-miR-132*   | 6.03E-03 | 9.13E-04 | 3.513683  | -1.0627 | 1.929516  |
| hsa-miR-132*   | 1.44E-02 | 2.75E-03 | 3.141332  | -2.0838 | 2.038358  |
| hsa-miR-132    | 1.03E-02 | 1.74E-03 | 3.299449  | -1.6593 | 1.810872  |
| hsa-miR-132    | 1.13E-02 | 1.96E-03 | 3.258803  | -1.7697 | 1.790335  |
| hsa-miR-132    | 1.16E-02 | 2.03E-03 | 3.245923  | -1.8045 | 1.809205  |
| hsa-miR-132    | 1.18E-02 | 2.08E-03 | 3.237543  | -1.8271 | 1.812181  |

|                 |          |          |          |         |          |
|-----------------|----------|----------|----------|---------|----------|
| hsa-miR-132     | 1.18E-02 | 2.08E-03 | 3.237483 | -1.8273 | 1.750983 |
| hsa-miR-132     | 1.19E-02 | 2.12E-03 | 3.231937 | -1.8422 | 1.784468 |
| hsa-miR-132     | 1.28E-02 | 2.35E-03 | 3.195475 | -1.94   | 1.808139 |
| hsa-miR-132     | 1.34E-02 | 2.51E-03 | 3.173221 | -1.9993 | 1.736143 |
| hsa-miR-132     | 1.65E-02 | 3.32E-03 | 3.075875 | -2.2554 | 1.870289 |
| hsa-miR-132     | 2.29E-02 | 5.01E-03 | 2.928414 | -2.6328 | 2.022962 |
| hsa-miR-127-3p  | 3.78E-03 | 5.13E-04 | 3.700401 | -0.5241 | 3.2228   |
| hsa-miR-127-3p  | 4.33E-03 | 6.11E-04 | 3.644327 | -0.6876 | 3.353788 |
| hsa-miR-126     | 1.29E-02 | 2.38E-03 | 3.191135 | -1.9516 | 1.516397 |
| hsa-miR-126     | 1.34E-02 | 2.51E-03 | 3.173641 | -1.9982 | 1.518989 |
| hsa-miR-126     | 1.45E-02 | 2.79E-03 | 3.13663  | -2.0962 | 1.514972 |
| hsa-miR-126     | 1.46E-02 | 2.83E-03 | 3.131763 | -2.109  | 1.512317 |
| hsa-miR-126     | 1.47E-02 | 2.87E-03 | 3.126185 | -2.1237 | 1.525937 |
| hsa-miR-126     | 1.68E-02 | 3.41E-03 | 3.06582  | -2.2816 | 1.538143 |
| hsa-miR-126     | 1.79E-02 | 3.70E-03 | 3.037493 | -2.3549 | 1.507357 |
| hsa-miR-126     | 1.91E-02 | 3.99E-03 | 3.010148 | -2.4252 | 1.521527 |
| hsa-miR-126     | 2.62E-02 | 6.15E-03 | 2.85361  | -2.8191 | 1.540071 |
| hsa-miR-126     | 2.76E-02 | 6.63E-03 | 2.826107 | -2.8868 | 1.722931 |
| hsa-miR-126     | 9.21E-02 | 3.28E-02 | 2.192464 | -4.3035 | 1.939886 |
| hsa-miR-126     | 1.07E-01 | 3.91E-02 | 2.115906 | -4.455  | 1.948347 |
| hsa-miR-125b-2* | 4.78E-02 | 1.34E-02 | 2.557279 | -3.5219 | 1.780825 |
| hsa-miR-125b-2* | 5.34E-02 | 1.58E-02 | 2.493594 | -3.6652 | 1.898562 |
| hsa-miR-125b    | 1.68E-02 | 3.42E-03 | 3.064864 | -2.284  | 2.288053 |
| hsa-miR-125b    | 1.69E-02 | 3.47E-03 | 3.060458 | -2.2955 | 2.3331   |
| hsa-miR-125b    | 1.86E-02 | 3.86E-03 | 3.022202 | -2.3943 | 2.264475 |
| hsa-miR-125b    | 1.86E-02 | 3.87E-03 | 3.021309 | -2.3966 | 2.275082 |
| hsa-miR-125b    | 2.01E-02 | 4.25E-03 | 2.988183 | -2.4814 | 2.236249 |
| hsa-miR-125b    | 2.02E-02 | 4.27E-03 | 2.98605  | -2.4868 | 2.235584 |
| hsa-miR-125b    | 2.11E-02 | 4.55E-03 | 2.963617 | -2.5439 | 2.231998 |
| hsa-miR-125b    | 2.18E-02 | 4.72E-03 | 2.950234 | -2.5778 | 2.214991 |
| hsa-miR-125b    | 2.24E-02 | 4.89E-03 | 2.937165 | -2.6107 | 2.207963 |
| hsa-miR-125b    | 2.40E-02 | 5.41E-03 | 2.900977 | -2.7015 | 2.255835 |
| hsa-miR-125b    | 2.43E-02 | 5.52E-03 | 2.893394 | -2.7204 | 2.353281 |
| hsa-miR-125b    | 2.43E-02 | 5.56E-03 | 2.89106  | -2.7263 | 2.266032 |
| hsa-miR-125b    | 2.50E-02 | 5.79E-03 | 2.876218 | -2.7632 | 2.245203 |
| hsa-miR-125b    | 2.61E-02 | 6.11E-03 | 2.856173 | -2.8128 | 2.242828 |
| hsa-miR-125b    | 2.64E-02 | 6.22E-03 | 2.849612 | -2.829  | 2.211325 |
| hsa-miR-125b    | 2.82E-02 | 6.84E-03 | 2.814604 | -2.9149 | 2.192884 |
| hsa-miR-10b     | 1.19E-02 | 2.10E-03 | 3.234064 | -1.8365 | 2.240798 |
| hsa-miR-10b     | 1.23E-02 | 2.21E-03 | 3.217751 | -1.8804 | 2.284041 |
| hsa-miR-10b     | 1.25E-02 | 2.28E-03 | 3.207072 | -1.909  | 2.167075 |
| hsa-miR-10b     | 1.31E-02 | 2.42E-03 | 3.186507 | -1.9639 | 2.161368 |
| hsa-miR-10b     | 1.33E-02 | 2.47E-03 | 3.178421 | -1.9855 | 2.288075 |
| hsa-miR-10b     | 1.34E-02 | 2.51E-03 | 3.173795 | -1.9978 | 2.15294  |

|             |          |          |          |         |          |
|-------------|----------|----------|----------|---------|----------|
| hsa-miR-10b | 1.37E-02 | 2.58E-03 | 3.16317  | -2.026  | 2.246729 |
| hsa-miR-10b | 1.39E-02 | 2.64E-03 | 3.155911 | -2.0452 | 2.246101 |
| hsa-miR-10b | 1.43E-02 | 2.73E-03 | 3.143451 | -2.0782 | 2.288633 |
| hsa-miR-10b | 1.45E-02 | 2.78E-03 | 3.137298 | -2.0944 | 2.135598 |
| hsa-miR-10b | 1.45E-02 | 2.80E-03 | 3.135064 | -2.1003 | 2.142655 |
| hsa-miR-10b | 1.47E-02 | 2.86E-03 | 3.127956 | -2.1191 | 2.139287 |
| hsa-miR-10b | 1.47E-02 | 2.88E-03 | 3.125978 | -2.1243 | 2.272166 |
| hsa-miR-10b | 1.48E-02 | 2.91E-03 | 3.121331 | -2.1365 | 2.116744 |
| hsa-miR-10b | 2.18E-02 | 4.73E-03 | 2.949356 | -2.58   | 2.491319 |
| hsa-miR-101 | 7.32E-03 | 1.14E-03 | 3.441128 | -1.2674 | 1.692327 |
| hsa-miR-101 | 8.43E-03 | 1.35E-03 | 3.383212 | -1.4289 | 1.648727 |
| hsa-miR-101 | 8.88E-03 | 1.44E-03 | 3.363413 | -1.4836 | 1.629671 |
| hsa-miR-101 | 9.07E-03 | 1.47E-03 | 3.354587 | -1.508  | 1.564886 |
| hsa-miR-101 | 9.11E-03 | 1.49E-03 | 3.351719 | -1.5159 | 1.598533 |
| hsa-miR-101 | 9.33E-03 | 1.53E-03 | 3.341567 | -1.5439 | 1.593737 |
| hsa-miR-101 | 9.33E-03 | 1.54E-03 | 3.340944 | -1.5456 | 1.570912 |
| hsa-miR-101 | 9.79E-03 | 1.62E-03 | 3.322286 | -1.5968 | 1.680613 |
| hsa-miR-101 | 9.84E-03 | 1.63E-03 | 3.319794 | -1.6036 | 1.654126 |
| hsa-miR-101 | 1.00E-02 | 1.67E-03 | 3.312508 | -1.6236 | 1.605062 |
| hsa-miR-101 | 1.04E-02 | 1.75E-03 | 3.29593  | -1.6689 | 1.5984   |
| hsa-miR-101 | 1.05E-02 | 1.80E-03 | 3.288035 | -1.6904 | 1.637214 |
| hsa-miR-101 | 1.10E-02 | 1.88E-03 | 3.272587 | -1.7324 | 1.551569 |
| hsa-miR-101 | 1.10E-02 | 1.90E-03 | 3.268827 | -1.7426 | 1.680407 |
| hsa-miR-101 | 1.18E-02 | 2.07E-03 | 3.239038 | -1.8231 | 1.658807 |
| hsa-miR-101 | 1.48E-02 | 2.91E-03 | 3.122235 | -2.1341 | 1.637841 |
| hsa-miR-100 | 1.36E-02 | 2.56E-03 | 3.166393 | -2.0174 | 2.595684 |
| hsa-miR-100 | 2.02E-02 | 4.29E-03 | 2.984198 | -2.4916 | 2.525392 |
| hsa-miR-100 | 2.03E-02 | 4.31E-03 | 2.98294  | -2.4948 | 2.507411 |
| hsa-miR-100 | 2.06E-02 | 4.40E-03 | 2.975572 | -2.5135 | 2.464667 |
| hsa-miR-100 | 2.14E-02 | 4.62E-03 | 2.958209 | -2.5576 | 2.479062 |
| hsa-miR-100 | 2.24E-02 | 4.88E-03 | 2.938418 | -2.6076 | 2.448901 |
| hsa-miR-100 | 2.31E-02 | 5.09E-03 | 2.92324  | -2.6458 | 2.733968 |
| hsa-miR-100 | 2.32E-02 | 5.13E-03 | 2.919822 | -2.6544 | 2.453304 |
| hsa-miR-100 | 2.32E-02 | 5.18E-03 | 2.916422 | -2.6629 | 2.751434 |
| hsa-miR-100 | 2.39E-02 | 5.38E-03 | 2.903083 | -2.6963 | 2.689173 |
| hsa-miR-100 | 2.40E-02 | 5.42E-03 | 2.899919 | -2.7042 | 2.774586 |
| hsa-miR-100 | 2.61E-02 | 6.13E-03 | 2.855245 | -2.8151 | 2.72721  |
| hsa-miR-100 | 2.67E-02 | 6.31E-03 | 2.844596 | -2.8413 | 2.726579 |
| hsa-miR-100 | 2.70E-02 | 6.42E-03 | 2.838073 | -2.8574 | 2.699173 |
| hsa-miR-100 | 2.85E-02 | 6.97E-03 | 2.807606 | -2.932  | 2.789604 |
| hsa-let-7c  | 4.72E-02 | 1.31E-02 | 2.56617  | -3.5017 | 1.950153 |
| hsa-let-7c  | 4.78E-02 | 1.34E-02 | 2.558204 | -3.5198 | 1.93759  |
| hsa-let-7c  | 5.05E-02 | 1.45E-02 | 2.527438 | -3.5894 | 1.643228 |
| hsa-let-7c  | 5.09E-02 | 1.47E-02 | 2.523367 | -3.5986 | 1.949649 |

|            |          |          |          |         |          |
|------------|----------|----------|----------|---------|----------|
| hsa-let-7c | 5.13E-02 | 1.48E-02 | 2.519518 | -3.6072 | 1.897737 |
| hsa-let-7c | 5.34E-02 | 1.58E-02 | 2.494616 | -3.663  | 1.623935 |
| hsa-let-7c | 5.37E-02 | 1.60E-02 | 2.488733 | -3.6761 | 1.900841 |
| hsa-let-7c | 5.39E-02 | 1.61E-02 | 2.486955 | -3.68   | 1.616021 |
| hsa-let-7c | 5.39E-02 | 1.61E-02 | 2.485636 | -3.6829 | 1.625902 |
| hsa-let-7c | 5.43E-02 | 1.63E-02 | 2.481295 | -3.6926 | 1.620282 |
| hsa-let-7c | 5.56E-02 | 1.68E-02 | 2.469251 | -3.7193 | 1.623894 |
| hsa-let-7c | 5.59E-02 | 1.69E-02 | 2.46702  | -3.7242 | 2.100843 |
| hsa-let-7c | 5.60E-02 | 1.70E-02 | 2.465498 | -3.7276 | 1.886725 |
| hsa-let-7c | 5.65E-02 | 1.71E-02 | 2.460991 | -3.7375 | 1.612253 |
| hsa-let-7c | 5.66E-02 | 1.72E-02 | 2.459064 | -3.7418 | 1.880387 |
| hsa-let-7c | 5.84E-02 | 1.79E-02 | 2.443455 | -3.7761 | 1.617576 |
| hsa-let-7b | 3.44E-02 | 8.69E-03 | 2.725095 | -3.131  | 1.524046 |
| hsa-let-7b | 3.94E-02 | 1.03E-02 | 2.66175  | -3.2808 | 1.50066  |
| hsa-let-7b | 4.10E-02 | 1.08E-02 | 2.640998 | -3.3293 | 1.535758 |
| hsa-let-7b | 4.10E-02 | 1.09E-02 | 2.640495 | -3.3305 | 1.530075 |
| hsa-let-7b | 1.05E-01 | 3.83E-02 | 2.124791 | -4.4376 | 1.899971 |
| hsa-let-7b | 1.18E-01 | 4.48E-02 | 2.055732 | -4.5708 | 1.75516  |

---
