# Supplementary material for: Establishment and Comprehensive Analysis of Underlying microRNA-mRNA Interactive Networks in Ovarian Cancer
Source: J Oncol. 2022 Mar 10;2022:5120342. doi: 10.1155/2022/5120342 (PMC8930263; doi:10.1155/2022/5120342)
Supplement: Supplementary Materials — Table S1. DEMs between OC and normal tissue from the GSE25405 dataset. Table S2. DEMs between OC and normal tissue from the GSE119055 dataset. Table S3. Target genes of DEMs predicted by miRNet. [file 5120342.f1.zip]

Archive with 3 entries (3 files):
- 5120342.f1/Supplementary Table S1.pdf
- 5120342.f1/Supplementary Table S2.pdf
- 5120342.f1/Supplementary Table S3.pdf
